# Supplementary material for: Real-world Pharmacovigilance Investigation and Pharmaceutical Care of Tetracycline antibiotics: Analysis of the FAERS Database
Source: Research Square preprint supplement (doi:10.21203/rs.3.rs-6524974/v1), 2025-05-13

**Real-world Pharmacovigilance Investigation and Pharmaceutical Care of Tetracycline antibiotics: Analysis of the FAERS Database**

Xiaohui Liu1, Ximu Sun1*, Han Zhou1, Yixin Sun2, Qixiang Guo3, Peng Guo1

* Ximu Sun and Xiaohui Liu have contributed equally to this work.

1 Department of Pharmacy, Beijing Children's Hospital, Capital Medical University, National Center for Children's Health, Beijing 100045, China

2 Clinical Research Center, Beijing Children's Hospital, Capital Medical University, National Center for Children's Health, Beijing 100045, China

3 School of Pharmaceutical Sciences, Tsinghua University, Beijing 100084, China

Corresponding author: Peng Guo, No. 56 Nan Lishi Road, Xicheng District, Beijing 100045, China; Email: guopeng@edu.com.cn

**Table S1. Distribution of signals for tetracyclines.**

| **Drug** | **PT** | **N** | **SOC** | **ROR** | **ROR025** | **ROR975** | **IC025** |
| --- | --- | --- | --- | --- | --- | --- | --- |
| Doxycycline | drug hypersensitivity | 1570 | Immune system disorders | 9.23 | 8.76 | 9.72 | 2.98 |
| nausea | 1105 | Gastrointestinal disorders | 1.54 | 1.45 | 1.64 | 0.49 |
| vomiting | 942 | Gastrointestinal disorders | 2.21 | 2.07 | 2.36 | 1.00 |
| headache | 771 | Nervous system disorders | 1.30 | 1.21 | 1.39 | 0.25 |
| rash | 698 | Skin and subcutaneous tissue disorders | 1.86 | 1.72 | 2.01 | 0.75 |
| malaise | 534 | General disorders and administration site conditions | 1.21 | 1.11 | 1.32 | 0.14 |
| pruritus | 404 | Skin and subcutaneous tissue disorders | 1.27 | 1.15 | 1.40 | 0.19 |
| abdominal pain upper | 382 | Gastrointestinal disorders | 1.99 | 1.80 | 2.20 | 0.82 |
| condition aggravated | 347 | General disorders and administration site conditions | 1.19 | 1.07 | 1.33 | 0.09 |
| abdominal discomfort | 327 | Gastrointestinal disorders | 2.09 | 1.88 | 2.33 | 0.88 |
| drug interaction | 284 | General disorders and administration site conditions | 1.94 | 1.72 | 2.18 | 0.76 |
| product use in unapproved indication | 275 | Injury, poisoning and procedural complications | 1.43 | 1.27 | 1.61 | 0.33 |
| urticaria | 268 | Skin and subcutaneous tissue disorders | 1.88 | 1.66 | 2.12 | 0.71 |
| photosensitivity reaction | 260 | Skin and subcutaneous tissue disorders | 16.47 | 14.56 | 18.63 | 3.78 |
| drug ineffective for unapproved indication | 259 | General disorders and administration site conditions | 6.00 | 5.30 | 6.78 | 2.36 |
| treatment failure | 258 | General disorders and administration site conditions | 3.74 | 3.30 | 4.23 | 1.69 |
| chest pain | 251 | General disorders and administration site conditions | 1.33 | 1.17 | 1.51 | 0.22 |
| erythema | 230 | Skin and subcutaneous tissue disorders | 1.24 | 1.09 | 1.41 | 0.11 |
| jarisch-herxheimer reaction | 229 | Immune system disorders | 594.95 | 507.50 | 697.46 | 7.52 |
| hypersensitivity | 222 | Immune system disorders | 1.30 | 1.14 | 1.49 | 0.18 |
| vision blurred | 219 | Eye disorders | 1.75 | 1.53 | 2.00 | 0.59 |
| paraesthesia | 208 | Nervous system disorders | 1.37 | 1.19 | 1.57 | 0.24 |
| tinnitus | 204 | Ear and labyrinth disorders | 4.78 | 4.16 | 5.48 | 2.02 |
| pancreatitis acute | 203 | Gastrointestinal disorders | 9.79 | 8.52 | 11.25 | 3.03 |
| suicidal ideation | 198 | Psychiatric disorders | 2.25 | 1.96 | 2.59 | 0.95 |
| oesophageal ulcer | 196 | Gastrointestinal disorders | 49.75 | 43.09 | 57.44 | 5.19 |
| blister | 185 | Skin and subcutaneous tissue disorders | 3.61 | 3.12 | 4.17 | 1.61 |
| intentional product use issue | 182 | Injury, poisoning and procedural complications | 1.95 | 1.68 | 2.25 | 0.73 |
| oesophagitis | 178 | Gastrointestinal disorders | 15.25 | 13.14 | 17.69 | 3.62 |
| dysphagia | 173 | Gastrointestinal disorders | 1.93 | 1.66 | 2.24 | 0.71 |
| swelling face | 172 | General disorders and administration site conditions | 2.89 | 2.48 | 3.36 | 1.28 |
| dyspepsia | 165 | Gastrointestinal disorders | 1.76 | 1.51 | 2.05 | 0.58 |
| palpitations | 146 | Cardiac disorders | 1.32 | 1.12 | 1.56 | 0.15 |
| visual impairment | 142 | Eye disorders | 1.27 | 1.08 | 1.50 | 0.09 |
| lip swelling | 139 | Gastrointestinal disorders | 4.88 | 4.13 | 5.77 | 2.00 |
| drug intolerance | 135 | General disorders and administration site conditions | 1.49 | 1.26 | 1.76 | 0.31 |
| cholangitis sclerosing | 130 | Hepatobiliary disorders | 63.63 | 53.31 | 75.96 | 5.35 |
| swollen tongue | 130 | Gastrointestinal disorders | 4.64 | 3.90 | 5.52 | 1.92 |
| pancreatitis | 123 | Gastrointestinal disorders | 2.38 | 1.99 | 2.84 | 0.97 |
| gastrointestinal disorder | 122 | Gastrointestinal disorders | 1.53 | 1.28 | 1.83 | 0.34 |
| intracranial pressure increased | 119 | Nervous system disorders | 22.84 | 19.04 | 27.40 | 4.08 |
| oropharyngeal pain | 119 | Respiratory, thoracic and mediastinal disorders | 1.25 | 1.04 | 1.50 | 0.05 |
| drug-induced liver injury | 118 | Hepatobiliary disorders | 4.93 | 4.11 | 5.91 | 1.99 |
| stevens-johnson syndrome | 111 | Skin and subcutaneous tissue disorders | 4.98 | 4.13 | 6.01 | 2.00 |
| jaundice | 109 | Hepatobiliary disorders | 3.87 | 3.20 | 4.67 | 1.64 |
| abortion spontaneous | 109 | Pregnancy, puerperium and perinatal conditions | 2.79 | 2.31 | 3.37 | 1.18 |
| gastrooesophageal reflux disease | 105 | Gastrointestinal disorders | 1.23 | 1.01 | 1.49 | 0.00 |
| rash pruritic | 103 | Skin and subcutaneous tissue disorders | 2.17 | 1.79 | 2.64 | 0.81 |
| depressed mood | 100 | Psychiatric disorders | 1.95 | 1.61 | 2.38 | 0.66 |
| rash erythematous | 98 | Skin and subcutaneous tissue disorders | 2.53 | 2.08 | 3.09 | 1.02 |
| hypoglycaemia | 97 | Metabolism and nutrition disorders | 2.07 | 1.70 | 2.53 | 0.74 |
| burning sensation | 97 | Nervous system disorders | 1.45 | 1.19 | 1.77 | 0.23 |
| colitis ulcerative | 95 | Gastrointestinal disorders | 1.98 | 1.61 | 2.42 | 0.66 |
| skin exfoliation | 92 | Skin and subcutaneous tissue disorders | 1.31 | 1.07 | 1.61 | 0.08 |
| drug reaction with eosinophilia and systemic symptoms | 85 | Skin and subcutaneous tissue disorders | 4.13 | 3.33 | 5.11 | 1.69 |
| anaphylactic reaction | 85 | Immune system disorders | 1.79 | 1.45 | 2.22 | 0.51 |
| fixed eruption | 83 | Skin and subcutaneous tissue disorders | 67.56 | 54.13 | 84.33 | 5.20 |
| therapy non-responder | 83 | General disorders and administration site conditions | 2.34 | 1.88 | 2.90 | 0.88 |
| gastrointestinal injury | 82 | Injury, poisoning and procedural complications | 28.93 | 23.23 | 36.04 | 4.26 |
| tubulointerstitial nephritis | 82 | Renal and urinary disorders | 4.48 | 3.61 | 5.57 | 1.80 |
| pancytopenia | 81 | Blood and lymphatic system disorders | 1.51 | 1.21 | 1.88 | 0.26 |
| rash macular | 79 | Skin and subcutaneous tissue disorders | 2.59 | 2.07 | 3.23 | 1.02 |
| exposure during pregnancy | 78 | Injury, poisoning and procedural complications | 1.45 | 1.16 | 1.81 | 0.19 |
| gastric ulcer | 77 | Gastrointestinal disorders | 3.83 | 3.06 | 4.79 | 1.56 |
| panic attack | 75 | Psychiatric disorders | 2.11 | 1.68 | 2.65 | 0.72 |
| medication error | 75 | Injury, poisoning and procedural complications | 1.58 | 1.26 | 1.98 | 0.30 |
| toxic epidermal necrolysis | 74 | Skin and subcutaneous tissue disorders | 5.04 | 4.01 | 6.34 | 1.94 |
| cholestasis | 73 | Hepatobiliary disorders | 4.16 | 3.31 | 5.24 | 1.67 |
| disease recurrence | 72 | General disorders and administration site conditions | 1.73 | 1.37 | 2.18 | 0.43 |
| diplopia | 70 | Eye disorders | 2.73 | 2.16 | 3.45 | 1.07 |
| odynophagia | 66 | Gastrointestinal disorders | 11.41 | 8.95 | 14.55 | 3.02 |
| international normalised ratio increased | 66 | Investigations | 2.33 | 1.83 | 2.97 | 0.83 |
| eye pain | 66 | Eye disorders | 1.37 | 1.08 | 1.74 | 0.08 |
| papilloedema | 63 | Eye disorders | 14.28 | 11.13 | 18.31 | 3.30 |
| gastrointestinal mucosal necrosis | 60 | Gastrointestinal disorders | 516.84 | 381.67 | 699.88 | 6.11 |
| sunburn | 60 | Injury, poisoning and procedural complications | 8.46 | 6.56 | 10.91 | 2.60 |
| throat irritation | 58 | Respiratory, thoracic and mediastinal disorders | 1.40 | 1.08 | 1.82 | 0.09 |
| drug resistance | 57 | General disorders and administration site conditions | 2.67 | 2.05 | 3.46 | 0.99 |
| acute hepatic failure | 56 | Hepatobiliary disorders | 4.66 | 3.58 | 6.06 | 1.77 |
| dermatitis bullous | 54 | Skin and subcutaneous tissue disorders | 8.28 | 6.33 | 10.82 | 2.54 |
| autoimmune hepatitis | 54 | Hepatobiliary disorders | 8.08 | 6.18 | 10.57 | 2.50 |
| pharyngeal oedema | 54 | Respiratory, thoracic and mediastinal disorders | 3.44 | 2.63 | 4.50 | 1.34 |
| drug eruption | 54 | Skin and subcutaneous tissue disorders | 3.14 | 2.40 | 4.10 | 1.21 |
| oral candidiasis | 52 | Infections and infestations | 3.94 | 3.00 | 5.18 | 1.52 |
| head discomfort | 52 | Nervous system disorders | 3.16 | 2.40 | 4.15 | 1.21 |
| angioedema | 52 | Skin and subcutaneous tissue disorders | 1.37 | 1.04 | 1.80 | 0.03 |
| rash maculo-papular | 51 | Skin and subcutaneous tissue disorders | 2.57 | 1.95 | 3.38 | 0.92 |
| multiple organ dysfunction syndrome | 51 | General disorders and administration site conditions | 2.27 | 1.72 | 2.99 | 0.74 |
| hepatitis | 51 | Hepatobiliary disorders | 2.02 | 1.53 | 2.66 | 0.58 |
| haematemesis | 50 | Gastrointestinal disorders | 1.99 | 1.51 | 2.63 | 0.56 |
| eye swelling | 50 | Eye disorders | 1.51 | 1.14 | 1.99 | 0.16 |
| lymphadenopathy | 50 | Blood and lymphatic system disorders | 1.36 | 1.03 | 1.79 | 0.01 |
| fungal infection | 49 | Infections and infestations | 1.51 | 1.14 | 2.00 | 0.16 |
| eosinophilia | 48 | Blood and lymphatic system disorders | 2.93 | 2.21 | 3.89 | 1.08 |
| oesophageal pain | 47 | Gastrointestinal disorders | 12.26 | 9.19 | 16.35 | 3.00 |
| deafness | 47 | Ear and labyrinth disorders | 1.82 | 1.37 | 2.43 | 0.41 |
| liver function test abnormal | 47 | Investigations | 1.50 | 1.13 | 2.00 | 0.14 |
| contraindicated product administered | 47 | Injury, poisoning and procedural complications | 1.42 | 1.06 | 1.89 | 0.06 |
| photophobia | 46 | Eye disorders | 2.65 | 1.99 | 3.54 | 0.94 |
| benign intracranial hypertension | 45 | Nervous system disorders | 31.66 | 23.54 | 42.59 | 4.09 |
| tooth discolouration | 45 | Gastrointestinal disorders | 16.91 | 12.60 | 22.71 | 3.38 |
| coagulopathy | 45 | Blood and lymphatic system disorders | 2.70 | 2.02 | 3.62 | 0.96 |
| mouth ulceration | 45 | Gastrointestinal disorders | 2.08 | 1.55 | 2.78 | 0.59 |
| hyperaesthesia | 44 | Nervous system disorders | 5.20 | 3.87 | 7.00 | 1.85 |
| hallucination, visual | 44 | Psychiatric disorders | 2.29 | 1.71 | 3.08 | 0.72 |
| transaminases increased | 42 | Investigations | 1.96 | 1.45 | 2.66 | 0.49 |
| acute generalised exanthematous pustulosis | 41 | Skin and subcutaneous tissue disorders | 6.06 | 4.46 | 8.25 | 2.04 |
| hepatic encephalopathy | 41 | Nervous system disorders | 4.21 | 3.10 | 5.73 | 1.54 |
| hepatotoxicity | 41 | Hepatobiliary disorders | 1.99 | 1.46 | 2.70 | 0.50 |
| rash generalised | 41 | Skin and subcutaneous tissue disorders | 1.56 | 1.14 | 2.11 | 0.16 |
| agranulocytosis | 40 | Blood and lymphatic system disorders | 2.46 | 1.80 | 3.35 | 0.79 |
| nephrogenic diabetes insipidus | 39 | Renal and urinary disorders | 37.67 | 27.37 | 51.83 | 4.17 |
| chromaturia | 39 | Renal and urinary disorders | 1.81 | 1.32 | 2.48 | 0.36 |
| pain of skin | 38 | Skin and subcutaneous tissue disorders | 1.61 | 1.17 | 2.21 | 0.18 |
| gastritis erosive | 36 | Gastrointestinal disorders | 6.95 | 5.00 | 9.64 | 2.17 |
| pemphigoid | 36 | Skin and subcutaneous tissue disorders | 5.73 | 4.13 | 7.96 | 1.92 |
| clostridium difficile infection | 36 | Infections and infestations | 1.76 | 1.27 | 2.45 | 0.30 |
| faeces discoloured | 36 | Gastrointestinal disorders | 1.70 | 1.23 | 2.36 | 0.25 |
| diabetes insipidus | 35 | Endocrine disorders | 15.06 | 10.79 | 21.02 | 3.12 |
| rosacea | 35 | Skin and subcutaneous tissue disorders | 7.94 | 5.69 | 11.07 | 2.33 |
| diarrhoea haemorrhagic | 35 | Gastrointestinal disorders | 3.71 | 2.66 | 5.17 | 1.32 |
| dermatitis | 35 | Skin and subcutaneous tissue disorders | 1.91 | 1.37 | 2.66 | 0.40 |
| throat tightness | 35 | Respiratory, thoracic and mediastinal disorders | 1.44 | 1.03 | 2.00 | 0.00 |
| idiopathic intracranial hypertension | 34 | Nervous system disorders | 18.47 | 13.16 | 25.93 | 3.34 |
| haemolytic anaemia | 34 | Blood and lymphatic system disorders | 3.77 | 2.69 | 5.29 | 1.34 |
| pruritus generalised | 34 | Skin and subcutaneous tissue disorders | 1.56 | 1.11 | 2.18 | 0.11 |
| rash papular | 33 | Skin and subcutaneous tissue disorders | 1.63 | 1.16 | 2.29 | 0.16 |
| bone marrow failure | 33 | Blood and lymphatic system disorders | 1.56 | 1.11 | 2.20 | 0.10 |
| pathogen resistance | 32 | Infections and infestations | 4.09 | 2.89 | 5.79 | 1.43 |
| clostridium difficile colitis | 32 | Infections and infestations | 3.01 | 2.13 | 4.26 | 1.01 |
| erosive oesophagitis | 31 | Gastrointestinal disorders | 15.95 | 11.18 | 22.74 | 3.13 |
| onychomadesis | 31 | Skin and subcutaneous tissue disorders | 8.70 | 6.11 | 12.39 | 2.40 |
| pharyngeal swelling | 31 | Respiratory, thoracic and mediastinal disorders | 4.13 | 2.90 | 5.88 | 1.43 |
| liver injury | 31 | Hepatobiliary disorders | 1.61 | 1.13 | 2.28 | 0.13 |
| foreign body | 30 | Injury, poisoning and procedural complications | 7.71 | 5.39 | 11.05 | 2.24 |
| skin reaction | 30 | Skin and subcutaneous tissue disorders | 2.40 | 1.68 | 3.44 | 0.68 |
| hepatocellular injury | 30 | Hepatobiliary disorders | 2.28 | 1.60 | 3.27 | 0.61 |
| aspergillus infection | 29 | Infections and infestations | 5.21 | 3.61 | 7.50 | 1.71 |
| cold sweat | 29 | Skin and subcutaneous tissue disorders | 1.74 | 1.21 | 2.51 | 0.22 |
| paranoia | 29 | Psychiatric disorders | 1.71 | 1.19 | 2.46 | 0.19 |
| retching | 29 | Gastrointestinal disorders | 1.50 | 1.04 | 2.15 | 0.01 |
| renal pain | 28 | Renal and urinary disorders | 2.67 | 1.84 | 3.87 | 0.80 |
| acute respiratory distress syndrome | 28 | Respiratory, thoracic and mediastinal disorders | 1.60 | 1.10 | 2.32 | 0.09 |
| gastric mucosal lesion | 27 | Gastrointestinal disorders | 36.57 | 24.93 | 53.66 | 3.86 |
| cholestatic liver injury | 27 | Hepatobiliary disorders | 17.53 | 11.98 | 25.64 | 3.15 |
| hepatic cytolysis | 27 | Hepatobiliary disorders | 3.90 | 2.67 | 5.69 | 1.30 |
| hypoaesthesia oral | 27 | Gastrointestinal disorders | 1.86 | 1.27 | 2.71 | 0.29 |
| oesophagitis ulcerative | 26 | Gastrointestinal disorders | 34.86 | 23.60 | 51.50 | 3.79 |
| hidradenitis | 26 | Skin and subcutaneous tissue disorders | 4.21 | 2.87 | 6.20 | 1.39 |
| cytopenia | 26 | Blood and lymphatic system disorders | 2.71 | 1.84 | 3.99 | 0.80 |
| anosmia | 26 | Nervous system disorders | 2.01 | 1.37 | 2.96 | 0.39 |
| paraesthesia oral | 26 | Gastrointestinal disorders | 1.99 | 1.36 | 2.93 | 0.37 |
| drug dispensing error | 26 | Injury, poisoning and procedural complications | 1.83 | 1.24 | 2.69 | 0.25 |
| vith nerve paralysis | 25 | Nervous system disorders | 22.07 | 14.86 | 32.79 | 3.34 |
| tearfulness | 25 | Psychiatric disorders | 5.67 | 3.83 | 8.41 | 1.76 |
| mouth swelling | 25 | Gastrointestinal disorders | 5.08 | 3.43 | 7.53 | 1.62 |
| ear discomfort | 25 | Ear and labyrinth disorders | 2.56 | 1.73 | 3.78 | 0.70 |
| parosmia | 24 | Nervous system disorders | 3.42 | 2.29 | 5.10 | 1.08 |
| skin hyperpigmentation | 24 | Skin and subcutaneous tissue disorders | 3.17 | 2.12 | 4.73 | 0.98 |
| therapy partial responder | 24 | General disorders and administration site conditions | 2.54 | 1.70 | 3.80 | 0.68 |
| glomerulonephritis minimal lesion | 23 | Renal and urinary disorders | 41.88 | 27.62 | 63.49 | 3.82 |
| burn oesophageal | 22 | Injury, poisoning and procedural complications | 42.72 | 27.92 | 65.39 | 3.79 |
| drug rash with eosinophilia and systemic symptoms | 22 | Skin and subcutaneous tissue disorders | 5.20 | 3.42 | 7.91 | 1.60 |
| aplastic anaemia | 22 | Blood and lymphatic system disorders | 4.33 | 2.85 | 6.58 | 1.36 |
| hepatitis cholestatic | 22 | Hepatobiliary disorders | 4.10 | 2.70 | 6.24 | 1.29 |
| vomiting projectile | 21 | Gastrointestinal disorders | 9.12 | 5.93 | 14.01 | 2.26 |
| tongue discolouration | 21 | Gastrointestinal disorders | 4.88 | 3.18 | 7.50 | 1.49 |
| neutrophilic dermatosis | 20 | Skin and subcutaneous tissue disorders | 64.38 | 41.04 | 100.99 | 3.94 |
| ulcerative keratitis | 20 | Eye disorders | 7.58 | 4.88 | 11.76 | 2.02 |
| nail discolouration | 20 | Skin and subcutaneous tissue disorders | 5.23 | 3.37 | 8.12 | 1.56 |
| product label issue | 20 | Product issues | 3.80 | 2.45 | 5.89 | 1.14 |
| facial pain | 20 | General disorders and administration site conditions | 2.18 | 1.40 | 3.38 | 0.40 |
| petechiae | 20 | Skin and subcutaneous tissue disorders | 1.89 | 1.22 | 2.93 | 0.20 |
| eyelid oedema | 20 | Eye disorders | 1.75 | 1.13 | 2.72 | 0.10 |
| pruritus genital | 19 | Reproductive system and breast disorders | 9.47 | 6.03 | 14.87 | 2.25 |
| rash morbilliform | 19 | Skin and subcutaneous tissue disorders | 7.99 | 5.09 | 12.55 | 2.05 |
| dermatomyositis | 19 | Skin and subcutaneous tissue disorders | 7.75 | 4.93 | 12.17 | 2.01 |
| eosinophilic pneumonia | 19 | Respiratory, thoracic and mediastinal disorders | 6.60 | 4.20 | 10.36 | 1.82 |
| keratitis | 19 | Eye disorders | 6.53 | 4.16 | 10.25 | 1.81 |
| lyme disease | 19 | Infections and infestations | 5.50 | 3.50 | 8.63 | 1.60 |
| aphagia | 19 | Gastrointestinal disorders | 3.50 | 2.23 | 5.49 | 1.01 |
| oral mucosal blistering | 19 | Gastrointestinal disorders | 3.27 | 2.08 | 5.13 | 0.92 |
| tendon disorder | 19 | Musculoskeletal and connective tissue disorders | 2.78 | 1.77 | 4.35 | 0.71 |
| sensation of foreign body | 19 | General disorders and administration site conditions | 2.51 | 1.60 | 3.94 | 0.57 |
| purpura | 19 | Skin and subcutaneous tissue disorders | 2.12 | 1.35 | 3.32 | 0.34 |
| visual field defect | 18 | Eye disorders | 2.39 | 1.50 | 3.79 | 0.48 |
| photoonycholysis | 17 | Skin and subcutaneous tissue disorders | 654.78 | 362.33 | 1183.26 | 4.27 |
| colour blindness | 17 | Congenital, familial and genetic disorders | 18.14 | 11.23 | 29.29 | 2.85 |
| papule | 17 | Skin and subcutaneous tissue disorders | 2.83 | 1.76 | 4.56 | 0.68 |
| erythema multiforme | 17 | Skin and subcutaneous tissue disorders | 1.81 | 1.12 | 2.91 | 0.08 |
| acquired haemophilia | 16 | Blood and lymphatic system disorders | 18.28 | 11.15 | 29.96 | 2.80 |
| onychalgia | 16 | Skin and subcutaneous tissue disorders | 15.53 | 9.48 | 25.44 | 2.65 |
| anti-neutrophil cytoplasmic antibody positive vasculitis | 16 | Immune system disorders | 8.86 | 5.41 | 14.48 | 2.06 |
| gastric perforation | 16 | Gastrointestinal disorders | 6.25 | 3.82 | 10.21 | 1.66 |
| potentiating drug interaction | 16 | General disorders and administration site conditions | 5.62 | 3.44 | 9.18 | 1.53 |
| oesophageal stenosis | 16 | Gastrointestinal disorders | 5.42 | 3.32 | 8.87 | 1.49 |
| duodenitis | 16 | Gastrointestinal disorders | 4.41 | 2.70 | 7.21 | 1.23 |
| ecchymosis | 16 | Skin and subcutaneous tissue disorders | 2.14 | 1.31 | 3.50 | 0.28 |
| rebound effect | 16 | General disorders and administration site conditions | 2.10 | 1.28 | 3.43 | 0.25 |
| facial paralysis | 16 | Nervous system disorders | 2.07 | 1.27 | 3.39 | 0.24 |
| lupus-like syndrome | 16 | Musculoskeletal and connective tissue disorders | 1.99 | 1.22 | 3.25 | 0.18 |
| hypereosinophilic syndrome | 15 | Blood and lymphatic system disorders | 33.66 | 20.14 | 56.24 | 3.22 |
| disinhibition | 15 | Psychiatric disorders | 8.88 | 5.34 | 14.76 | 2.02 |
| splenic infarction | 15 | Blood and lymphatic system disorders | 8.58 | 5.16 | 14.25 | 1.98 |
| communication disorder | 15 | Psychiatric disorders | 4.01 | 2.41 | 6.66 | 1.07 |
| periorbital swelling | 15 | Eye disorders | 3.71 | 2.23 | 6.16 | 0.97 |
| vulvovaginal mycotic infection | 15 | Infections and infestations | 3.62 | 2.18 | 6.01 | 0.94 |
| feeling of despair | 15 | Psychiatric disorders | 3.19 | 1.92 | 5.29 | 0.78 |
| social avoidant behaviour | 15 | Psychiatric disorders | 2.57 | 1.55 | 4.26 | 0.49 |
| hepatitis acute | 15 | Hepatobiliary disorders | 2.39 | 1.44 | 3.96 | 0.40 |
| panic reaction | 15 | Psychiatric disorders | 2.18 | 1.31 | 3.62 | 0.28 |
| oesophageal injury | 14 | Injury, poisoning and procedural complications | 42.74 | 25.07 | 72.86 | 3.28 |
| glomerulonephritis rapidly progressive | 14 | Renal and urinary disorders | 15.04 | 8.88 | 25.49 | 2.51 |
| genital pain | 14 | Reproductive system and breast disorders | 10.82 | 6.39 | 18.32 | 2.18 |
| methaemoglobinaemia | 14 | Blood and lymphatic system disorders | 8.22 | 4.86 | 13.91 | 1.89 |
| hyperacusis | 14 | Ear and labyrinth disorders | 4.01 | 2.38 | 6.79 | 1.04 |
| ocular icterus | 14 | Hepatobiliary disorders | 3.20 | 1.90 | 5.42 | 0.75 |
| activated partial thromboplastin time prolonged | 14 | Investigations | 2.57 | 1.52 | 4.35 | 0.46 |
| cheilitis | 14 | Gastrointestinal disorders | 2.54 | 1.50 | 4.29 | 0.44 |
| pulmonary toxicity | 14 | Respiratory, thoracic and mediastinal disorders | 2.30 | 1.36 | 3.88 | 0.31 |
| faeces soft | 14 | Gastrointestinal disorders | 1.93 | 1.14 | 3.26 | 0.08 |
| shock haemorrhagic | 14 | Vascular disorders | 1.86 | 1.10 | 3.15 | 0.03 |
| oesophageal irritation | 13 | Gastrointestinal disorders | 26.21 | 15.13 | 45.42 | 2.89 |
| oesophageal discomfort | 13 | Gastrointestinal disorders | 19.42 | 11.22 | 33.60 | 2.66 |
| cutaneous lupus erythematosus | 13 | Skin and subcutaneous tissue disorders | 6.78 | 3.93 | 11.70 | 1.62 |
| hypersensitivity vasculitis | 13 | Skin and subcutaneous tissue disorders | 5.11 | 2.96 | 8.81 | 1.29 |
| skin warm | 13 | Skin and subcutaneous tissue disorders | 2.42 | 1.40 | 4.16 | 0.34 |
| dermatitis acneiform | 13 | Skin and subcutaneous tissue disorders | 2.22 | 1.29 | 3.82 | 0.23 |
| tendon pain | 13 | Musculoskeletal and connective tissue disorders | 1.92 | 1.11 | 3.30 | 0.03 |
| brucellosis | 12 | Infections and infestations | 97.44 | 54.08 | 175.54 | 3.41 |
| penile swelling | 12 | Reproductive system and breast disorders | 11.30 | 6.40 | 19.95 | 2.10 |
| onycholysis | 12 | Skin and subcutaneous tissue disorders | 8.47 | 4.80 | 14.96 | 1.81 |
| clostridium test positive | 12 | Investigations | 6.46 | 3.66 | 11.39 | 1.51 |
| compartment syndrome | 12 | Musculoskeletal and connective tissue disorders | 4.84 | 2.75 | 8.54 | 1.17 |
| lip blister | 12 | Gastrointestinal disorders | 4.73 | 2.68 | 8.35 | 1.15 |
| tongue oedema | 12 | Gastrointestinal disorders | 3.42 | 1.94 | 6.03 | 0.75 |
| jaundice cholestatic | 12 | Hepatobiliary disorders | 3.38 | 1.92 | 5.95 | 0.73 |
| hallucinations, mixed | 12 | Psychiatric disorders | 3.05 | 1.73 | 5.38 | 0.60 |
| product administered to patient of inappropriate age | 12 | Injury, poisoning and procedural complications | 2.62 | 1.49 | 4.62 | 0.41 |
| sensitive skin | 12 | Skin and subcutaneous tissue disorders | 2.18 | 1.23 | 3.83 | 0.16 |
| candidiasis | 12 | Infections and infestations | 2.16 | 1.22 | 3.80 | 0.15 |
| rheumatoid factor positive | 12 | Investigations | 1.94 | 1.10 | 3.42 | 0.01 |
| acne fulminans | 11 | Skin and subcutaneous tissue disorders | 72.53 | 39.46 | 133.34 | 3.18 |
| crystal nephropathy | 11 | Renal and urinary disorders | 24.59 | 13.53 | 44.67 | 2.65 |
| horner's syndrome | 11 | Nervous system disorders | 23.03 | 12.68 | 41.84 | 2.61 |
| symmetrical drug-related intertriginous and flexural exanthema | 11 | Skin and subcutaneous tissue disorders | 18.62 | 10.26 | 33.79 | 2.45 |
| retinal exudates | 11 | Eye disorders | 11.53 | 6.36 | 20.88 | 2.04 |
| reaction to excipient | 11 | Immune system disorders | 6.00 | 3.32 | 10.86 | 1.36 |
| acute febrile neutrophilic dermatosis | 11 | Skin and subcutaneous tissue disorders | 5.34 | 2.95 | 9.66 | 1.23 |
| negative thoughts | 11 | Psychiatric disorders | 4.18 | 2.31 | 7.56 | 0.94 |
| cutaneous vasculitis | 11 | Skin and subcutaneous tissue disorders | 4.09 | 2.26 | 7.39 | 0.91 |
| immune thrombocytopenic purpura | 11 | Blood and lymphatic system disorders | 3.59 | 1.98 | 6.48 | 0.75 |
| epigastric discomfort | 11 | Gastrointestinal disorders | 2.75 | 1.52 | 4.97 | 0.42 |
| oesophageal disorder | 11 | Gastrointestinal disorders | 2.71 | 1.50 | 4.90 | 0.40 |
| hepatic necrosis | 11 | Hepatobiliary disorders | 2.70 | 1.49 | 4.88 | 0.39 |
| mucous stools | 11 | Gastrointestinal disorders | 2.10 | 1.16 | 3.80 | 0.07 |
| dermatitis exfoliative | 11 | Skin and subcutaneous tissue disorders | 2.06 | 1.14 | 3.72 | 0.04 |
| depersonalisation | 10 | Psychiatric disorders | 10.46 | 5.61 | 19.50 | 1.86 |
| alcohol interaction | 10 | General disorders and administration site conditions | 5.36 | 2.88 | 9.98 | 1.16 |
| premature rupture of membranes | 10 | Pregnancy, puerperium and perinatal conditions | 4.03 | 2.16 | 7.49 | 0.83 |
| pseudomembranous colitis | 10 | Infections and infestations | 3.94 | 2.12 | 7.33 | 0.80 |
| self-injurious ideation | 10 | Psychiatric disorders | 2.54 | 1.37 | 4.73 | 0.26 |
| hypovolaemic shock | 10 | Vascular disorders | 2.26 | 1.21 | 4.20 | 0.11 |
| foetal death | 10 | Pregnancy, puerperium and perinatal conditions | 2.18 | 1.17 | 4.06 | 0.06 |
| venoocclusive liver disease | 10 | Hepatobiliary disorders | 2.17 | 1.17 | 4.03 | 0.05 |
| acne conglobata | 9 | Skin and subcutaneous tissue disorders | 145.14 | 72.65 | 289.98 | 3.02 |
| reactive gastropathy | 9 | Injury, poisoning and procedural complications | 23.60 | 12.20 | 45.67 | 2.38 |
| phimosis | 9 | Congenital, familial and genetic disorders | 12.59 | 6.53 | 24.29 | 1.92 |
| vascular injury | 9 | Injury, poisoning and procedural complications | 6.13 | 3.18 | 11.80 | 1.23 |
| enterobacter infection | 9 | Infections and infestations | 5.36 | 2.79 | 10.32 | 1.08 |
| human herpesvirus 6 infection | 9 | Infections and infestations | 4.82 | 2.50 | 9.27 | 0.96 |
| vasodilatation | 9 | Vascular disorders | 3.50 | 1.82 | 6.74 | 0.59 |
| oral intake reduced | 9 | Metabolism and nutrition disorders | 2.90 | 1.51 | 5.58 | 0.36 |
| depression suicidal | 9 | Psychiatric disorders | 2.76 | 1.43 | 5.31 | 0.29 |
| bone erosion | 9 | Musculoskeletal and connective tissue disorders | 2.24 | 1.16 | 4.31 | 0.03 |
| conjunctival cyst | 8 | Eye disorders | 164.59 | 78.58 | 344.76 | 2.83 |
| fixed drug eruption | 8 | Skin and subcutaneous tissue disorders | 68.19 | 33.44 | 139.06 | 2.66 |
| congenital hiatus hernia | 8 | Congenital, familial and genetic disorders | 39.61 | 19.58 | 80.13 | 2.47 |
| cranial nerve paralysis | 8 | Nervous system disorders | 30.70 | 15.21 | 61.94 | 2.36 |
| pseudoporphyria | 8 | Skin and subcutaneous tissue disorders | 25.46 | 12.64 | 51.29 | 2.26 |
| genital discomfort | 8 | Reproductive system and breast disorders | 16.60 | 8.26 | 33.36 | 2.00 |
| flashback | 8 | Psychiatric disorders | 13.92 | 6.93 | 27.94 | 1.87 |
| small intestine ulcer | 8 | Gastrointestinal disorders | 11.70 | 5.83 | 23.48 | 1.73 |
| abnormal sleep-related event | 8 | Psychiatric disorders | 6.52 | 3.25 | 13.06 | 1.19 |
| gluten sensitivity | 8 | Metabolism and nutrition disorders | 6.42 | 3.20 | 12.85 | 1.17 |
| xerosis | 8 | General disorders and administration site conditions | 6.21 | 3.10 | 12.44 | 1.14 |
| pharyngeal ulceration | 8 | Respiratory, thoracic and mediastinal disorders | 5.99 | 2.99 | 12.01 | 1.10 |
| thrombocytopenic purpura | 8 | Blood and lymphatic system disorders | 5.64 | 2.82 | 11.30 | 1.04 |
| malignant melanoma in situ | 8 | Neoplasms benign, malignant and unspecified (incl cysts and polyps) | 5.39 | 2.69 | 10.80 | 0.99 |
| ototoxicity | 8 | Ear and labyrinth disorders | 5.18 | 2.59 | 10.37 | 0.94 |
| optic atrophy | 8 | Eye disorders | 4.82 | 2.40 | 9.65 | 0.86 |
| polycythaemia | 8 | Blood and lymphatic system disorders | 4.43 | 2.21 | 8.87 | 0.77 |
| lip pain | 8 | Gastrointestinal disorders | 2.97 | 1.48 | 5.94 | 0.30 |
| gastrointestinal necrosis | 8 | Gastrointestinal disorders | 2.64 | 1.32 | 5.29 | 0.16 |
| liver transplant | 8 | Surgical and medical procedures | 2.38 | 1.19 | 4.76 | 0.03 |
| plasmodium falciparum infection | 7 | Infections and infestations | 60.09 | 28.12 | 128.41 | 2.40 |
| whipple's disease | 7 | Infections and infestations | 20.27 | 9.60 | 42.80 | 1.95 |
| portal hypertensive gastropathy | 7 | Gastrointestinal disorders | 12.56 | 5.96 | 26.45 | 1.63 |
| resting tremor | 7 | Nervous system disorders | 12.41 | 5.89 | 26.14 | 1.62 |
| dysbiosis | 7 | Gastrointestinal disorders | 11.71 | 5.56 | 24.67 | 1.57 |
| indifference | 7 | Psychiatric disorders | 11.05 | 5.25 | 23.26 | 1.53 |
| inflammatory pain | 7 | General disorders and administration site conditions | 10.67 | 5.07 | 22.45 | 1.50 |
| toxic shock syndrome | 7 | Infections and infestations | 10.44 | 4.96 | 21.97 | 1.48 |
| malaria | 7 | Infections and infestations | 9.81 | 4.66 | 20.65 | 1.43 |
| bone deformity | 7 | Musculoskeletal and connective tissue disorders | 9.79 | 4.65 | 20.61 | 1.43 |
| vasculitic rash | 7 | Skin and subcutaneous tissue disorders | 9.18 | 4.36 | 19.31 | 1.37 |
| laboratory test interference | 7 | Investigations | 9.17 | 4.36 | 19.29 | 1.37 |
| oesophageal obstruction | 7 | Gastrointestinal disorders | 7.98 | 3.80 | 16.79 | 1.25 |
| genital rash | 7 | Reproductive system and breast disorders | 5.31 | 2.53 | 11.16 | 0.85 |
| abdominal wall haematoma | 7 | Gastrointestinal disorders | 3.86 | 1.84 | 8.11 | 0.50 |
| kounis syndrome | 7 | Cardiac disorders | 3.60 | 1.71 | 7.56 | 0.42 |
| reaction to drug excipients | 7 | Immune system disorders | 3.48 | 1.66 | 7.31 | 0.39 |
| mixed liver injury | 7 | Hepatobiliary disorders | 3.45 | 1.64 | 7.25 | 0.38 |
| staring | 7 | Psychiatric disorders | 3.04 | 1.45 | 6.38 | 0.23 |
| type i hypersensitivity | 7 | Immune system disorders | 2.63 | 1.25 | 5.53 | 0.06 |
| iiird nerve injury | 6 | Injury, poisoning and procedural complications | 894.86 | 310.45 | 2579.40 | 2.37 |
| post infection glomerulonephritis | 6 | Renal and urinary disorders | 117.36 | 50.73 | 271.51 | 2.25 |
| conjoined twins | 6 | Congenital, familial and genetic disorders | 63.92 | 28.11 | 145.34 | 2.15 |
| alopecia scarring | 6 | Skin and subcutaneous tissue disorders | 41.62 | 18.44 | 93.95 | 2.03 |
| factitious disorder | 6 | Psychiatric disorders | 40.91 | 18.13 | 92.32 | 2.02 |
| balanitis | 6 | Reproductive system and breast disorders | 36.71 | 16.29 | 82.73 | 1.99 |
| hepatitis chronic active | 6 | Hepatobiliary disorders | 35.79 | 15.89 | 80.64 | 1.98 |
| vitamin k deficiency | 6 | Metabolism and nutrition disorders | 16.20 | 7.24 | 36.25 | 1.60 |
| corynebacterium infection | 6 | Infections and infestations | 12.43 | 5.56 | 27.78 | 1.43 |
| photodermatosis | 6 | Skin and subcutaneous tissue disorders | 11.89 | 5.32 | 26.58 | 1.39 |
| csf test abnormal | 6 | Investigations | 11.68 | 5.23 | 26.10 | 1.38 |
| genital swelling | 6 | Reproductive system and breast disorders | 10.14 | 4.54 | 22.65 | 1.27 |
| starvation | 6 | Metabolism and nutrition disorders | 8.96 | 4.01 | 20.01 | 1.18 |
| renal tubular injury | 6 | Renal and urinary disorders | 7.52 | 3.37 | 16.78 | 1.03 |
| idiosyncratic drug reaction | 6 | General disorders and administration site conditions | 7.00 | 3.14 | 15.63 | 0.96 |
| lip ulceration | 6 | Gastrointestinal disorders | 5.29 | 2.37 | 11.79 | 0.70 |
| normocytic anaemia | 6 | Blood and lymphatic system disorders | 5.15 | 2.31 | 11.48 | 0.67 |
| gastric ulcer perforation | 6 | Gastrointestinal disorders | 5.04 | 2.26 | 11.25 | 0.65 |
| feelings of worthlessness | 6 | Psychiatric disorders | 4.65 | 2.09 | 10.38 | 0.57 |
| foreign body in respiratory tract | 6 | Injury, poisoning and procedural complications | 4.65 | 2.08 | 10.36 | 0.56 |
| vulvovaginal candidiasis | 6 | Infections and infestations | 4.57 | 2.05 | 10.19 | 0.55 |
| auditory disorder | 6 | Ear and labyrinth disorders | 4.57 | 2.05 | 10.19 | 0.55 |
| linear iga disease | 6 | Skin and subcutaneous tissue disorders | 4.51 | 2.02 | 10.05 | 0.53 |
| allergic reaction to excipient | 6 | Immune system disorders | 4.01 | 1.80 | 8.95 | 0.41 |
| coagulation time prolonged | 6 | Investigations | 3.81 | 1.71 | 8.49 | 0.35 |
| calciphylaxis | 6 | Metabolism and nutrition disorders | 3.70 | 1.66 | 8.25 | 0.32 |
| alveolitis | 6 | Respiratory, thoracic and mediastinal disorders | 3.58 | 1.61 | 7.99 | 0.29 |
| ear swelling | 6 | Ear and labyrinth disorders | 3.25 | 1.46 | 7.24 | 0.18 |
| derealisation | 6 | Psychiatric disorders | 3.18 | 1.43 | 7.09 | 0.15 |
| conversion disorder | 6 | Psychiatric disorders | 3.04 | 1.37 | 6.79 | 0.10 |
| hypospadias | 6 | Congenital, familial and genetic disorders | 2.98 | 1.34 | 6.63 | 0.08 |
| urethritis mycoplasmal | 5 | Infections and infestations | 1491.34 | 400.43 | 5554.35 | 2.01 |
| perihepatitis | 5 | Infections and infestations | 372.84 | 136.57 | 1017.87 | 1.98 |
| cinchonism | 5 | Injury, poisoning and procedural complications | 161.23 | 63.36 | 410.28 | 1.93 |
| uvulitis | 5 | Gastrointestinal disorders | 56.81 | 23.16 | 139.36 | 1.79 |
| amoebic dysentery | 5 | Infections and infestations | 48.50 | 19.83 | 118.61 | 1.75 |
| blood electrolytes increased | 5 | Investigations | 40.86 | 16.75 | 99.65 | 1.71 |
| ocular rosacea | 5 | Eye disorders | 34.09 | 14.01 | 82.93 | 1.65 |
| generalised bullous fixed drug eruption | 5 | Skin and subcutaneous tissue disorders | 28.27 | 11.64 | 68.64 | 1.59 |
| alcohol problem | 5 | Psychiatric disorders | 22.26 | 9.19 | 53.92 | 1.49 |
| uraemic encephalopathy | 5 | Nervous system disorders | 20.36 | 8.41 | 49.29 | 1.45 |
| plantar erythema | 5 | Skin and subcutaneous tissue disorders | 19.75 | 8.16 | 47.81 | 1.43 |
| lymphomatoid papulosis | 5 | Skin and subcutaneous tissue disorders | 18.19 | 7.52 | 43.99 | 1.39 |
| intestinal sepsis | 5 | Infections and infestations | 17.81 | 7.36 | 43.07 | 1.38 |
| overlap syndrome | 5 | Immune system disorders | 11.17 | 4.63 | 26.95 | 1.11 |
| ankyloglossia congenital | 5 | Congenital, familial and genetic disorders | 10.54 | 4.37 | 25.42 | 1.07 |
| gastrointestinal stoma output increased | 5 | Investigations | 8.92 | 3.70 | 21.50 | 0.94 |
| spontaneous haematoma | 5 | Blood and lymphatic system disorders | 7.44 | 3.09 | 17.92 | 0.80 |
| tongue erythema | 5 | Gastrointestinal disorders | 6.86 | 2.85 | 16.52 | 0.73 |
| serratia infection | 5 | Infections and infestations | 6.68 | 2.77 | 16.09 | 0.71 |
| foreign body trauma | 5 | Injury, poisoning and procedural complications | 5.69 | 2.36 | 13.71 | 0.57 |
| oesophageal perforation | 5 | Gastrointestinal disorders | 5.59 | 2.32 | 13.45 | 0.55 |
| nuchal rigidity | 5 | Musculoskeletal and connective tissue disorders | 5.53 | 2.30 | 13.31 | 0.54 |
| eye colour change | 5 | Eye disorders | 5.39 | 2.24 | 12.97 | 0.52 |
| cerebral palsy | 5 | Congenital, familial and genetic disorders | 4.91 | 2.04 | 11.82 | 0.43 |
| skin sensitisation | 5 | Skin and subcutaneous tissue disorders | 4.60 | 1.91 | 11.06 | 0.36 |
| myasthenia gravis crisis | 5 | Nervous system disorders | 4.30 | 1.79 | 10.34 | 0.30 |
| depersonalisation/derealisation disorder | 5 | Psychiatric disorders | 4.22 | 1.75 | 10.15 | 0.28 |
| contraindicated product prescribed | 5 | Injury, poisoning and procedural complications | 3.79 | 1.57 | 9.12 | 0.17 |
| skin depigmentation | 5 | Skin and subcutaneous tissue disorders | 3.54 | 1.47 | 8.53 | 0.10 |
| ophthalmoplegia | 5 | Eye disorders | 3.37 | 1.40 | 8.10 | 0.04 |
| inhibitory drug interaction | 5 | General disorders and administration site conditions | 3.30 | 1.37 | 7.93 | 0.02 |
| vitritis | 5 | Eye disorders | 3.26 | 1.36 | 7.85 | 0.01 |
| daydreaming | 5 | Psychiatric disorders | 3.25 | 1.35 | 7.81 | 0.00 |
| tongue coated | 5 | Gastrointestinal disorders | 3.24 | 1.35 | 7.80 | 0.00 |
| conjunctival pigmentation | 4 | Eye disorders | 128.97 | 45.96 | 361.89 | 1.47 |
| anal candidiasis | 4 | Infections and infestations | 85.21 | 30.90 | 235.02 | 1.42 |
| immune recovery uveitis | 4 | Immune system disorders | 85.21 | 30.90 | 235.02 | 1.42 |
| penile necrosis | 4 | Reproductive system and breast disorders | 43.78 | 16.14 | 118.76 | 1.31 |
| solar urticaria | 4 | Skin and subcutaneous tissue disorders | 30.79 | 11.41 | 83.08 | 1.22 |
| hyperoxaluria | 4 | Renal and urinary disorders | 26.36 | 9.79 | 71.02 | 1.17 |
| laryngeal injury | 4 | Injury, poisoning and procedural complications | 23.39 | 8.69 | 62.93 | 1.13 |
| eosinophilic cellulitis | 4 | Skin and subcutaneous tissue disorders | 21.89 | 8.14 | 58.86 | 1.11 |
| genital blister | 4 | Reproductive system and breast disorders | 19.01 | 7.08 | 51.06 | 1.05 |
| laryngeal dyspnoea | 4 | Respiratory, thoracic and mediastinal disorders | 18.01 | 6.71 | 48.34 | 1.03 |
| nail pigmentation | 4 | Skin and subcutaneous tissue disorders | 17.04 | 6.35 | 45.73 | 1.00 |
| vancomycin infusion reaction | 4 | Skin and subcutaneous tissue disorders | 17.04 | 6.35 | 45.73 | 1.00 |
| epidermolysis bullosa | 4 | Congenital, familial and genetic disorders | 15.34 | 5.72 | 41.15 | 0.95 |
| documented hypersensitivity to administered drug | 4 | Injury, poisoning and procedural complications | 15.05 | 5.61 | 40.36 | 0.94 |
| meibomian gland dysfunction | 4 | Eye disorders | 10.53 | 3.94 | 28.19 | 0.74 |
| stoma site discomfort | 4 | Injury, poisoning and procedural complications | 9.62 | 3.60 | 25.74 | 0.68 |
| arachnoid cyst | 4 | Nervous system disorders | 9.07 | 3.39 | 24.27 | 0.65 |
| no reaction on previous exposure to drug | 4 | General disorders and administration site conditions | 8.17 | 3.06 | 21.85 | 0.57 |
| laryngeal discomfort | 4 | Respiratory, thoracic and mediastinal disorders | 7.93 | 2.96 | 21.19 | 0.55 |
| peak expiratory flow rate decreased | 4 | Investigations | 7.55 | 2.82 | 20.18 | 0.52 |
| corneal perforation | 4 | Eye disorders | 6.66 | 2.49 | 17.78 | 0.42 |
| hyperamylasaemia | 4 | Metabolism and nutrition disorders | 6.55 | 2.45 | 17.49 | 0.41 |
| documented hypersensitivity to administered product | 4 | Injury, poisoning and procedural complications | 6.53 | 2.44 | 17.44 | 0.40 |
| arthritis reactive | 4 | Musculoskeletal and connective tissue disorders | 6.47 | 2.42 | 17.28 | 0.40 |
| mycoplasma infection | 4 | Infections and infestations | 6.41 | 2.40 | 17.11 | 0.39 |
| oral mucosal discolouration | 4 | Gastrointestinal disorders | 6.35 | 2.38 | 16.95 | 0.38 |
| diaphragmatic paralysis | 4 | Respiratory, thoracic and mediastinal disorders | 6.23 | 2.33 | 16.64 | 0.37 |
| antineutrophil cytoplasmic antibody positive | 4 | Investigations | 5.94 | 2.22 | 15.85 | 0.33 |
| transient global amnesia | 4 | Nervous system disorders | 5.80 | 2.17 | 15.49 | 0.31 |
| fungal oesophagitis | 4 | Infections and infestations | 5.66 | 2.12 | 15.12 | 0.29 |
| acne pustular | 4 | Infections and infestations | 5.39 | 2.02 | 14.40 | 0.25 |
| chromatopsia | 4 | Eye disorders | 5.38 | 2.01 | 14.37 | 0.25 |
| intracranial hypotension | 4 | Nervous system disorders | 5.33 | 1.99 | 14.22 | 0.24 |
| grimacing | 4 | Nervous system disorders | 5.09 | 1.91 | 13.60 | 0.20 |
| physical product label issue | 4 | Product issues | 4.53 | 1.70 | 12.10 | 0.09 |
| mast cell activation syndrome | 4 | Blood and lymphatic system disorders | 4.50 | 1.69 | 12.02 | 0.09 |
| erosive duodenitis | 4 | Gastrointestinal disorders | 4.36 | 1.63 | 11.63 | 0.06 |
| neuromyelitis optica spectrum disorder | 4 | Nervous system disorders | 4.28 | 1.60 | 11.41 | 0.04 |
| genital hyperaesthesia | 3 | Reproductive system and breast disorders | 357.88 | 98.48 | 1300.51 | 0.90 |
| craniorachischisis | 3 | Congenital, familial and genetic disorders | 143.15 | 43.22 | 474.18 | 0.86 |
| arthritis allergic | 3 | Musculoskeletal and connective tissue disorders | 119.29 | 36.40 | 390.93 | 0.85 |
| periarticular thenar erythema with onycholysis | 3 | Skin and subcutaneous tissue disorders | 108.45 | 33.26 | 353.64 | 0.85 |
| autoimmune blistering disease | 3 | Skin and subcutaneous tissue disorders | 102.25 | 31.44 | 332.50 | 0.84 |
| penile rash | 3 | Reproductive system and breast disorders | 77.80 | 24.19 | 250.17 | 0.82 |
| autophony | 3 | Ear and labyrinth disorders | 65.07 | 20.35 | 208.01 | 0.80 |
| pulmonary capillary haemangiomatosis | 3 | Respiratory, thoracic and mediastinal disorders | 60.66 | 19.01 | 193.52 | 0.79 |
| medical device site hyperaesthesia | 3 | General disorders and administration site conditions | 59.65 | 18.70 | 190.20 | 0.79 |
| oesophagitis chemical | 3 | Injury, poisoning and procedural complications | 51.87 | 16.32 | 164.80 | 0.77 |
| radiation fibrosis - lung | 3 | Injury, poisoning and procedural complications | 50.40 | 15.87 | 160.05 | 0.76 |
| colour vision tests abnormal | 3 | Investigations | 47.09 | 14.85 | 149.29 | 0.75 |
| polymorphic light eruption | 3 | Skin and subcutaneous tissue disorders | 37.67 | 11.93 | 118.91 | 0.71 |
| mucocutaneous candidiasis | 3 | Infections and infestations | 36.15 | 11.46 | 114.02 | 0.70 |
| diffuse vasculitis | 3 | Vascular disorders | 32.24 | 10.24 | 101.51 | 0.68 |
| external ear pain | 3 | Ear and labyrinth disorders | 28.63 | 9.11 | 89.99 | 0.65 |
| hypnopompic hallucination | 3 | Psychiatric disorders | 28.18 | 8.97 | 88.55 | 0.65 |
| ulcerative gastritis | 3 | Gastrointestinal disorders | 25.75 | 8.20 | 80.81 | 0.62 |
| ventricular asystole | 3 | Cardiac disorders | 19.56 | 6.25 | 61.21 | 0.54 |
| injection site plaque | 3 | General disorders and administration site conditions | 16.96 | 5.43 | 53.02 | 0.49 |
| q fever | 3 | Infections and infestations | 16.05 | 5.14 | 50.14 | 0.47 |
| thoracic haemorrhage | 3 | Respiratory, thoracic and mediastinal disorders | 16.05 | 5.14 | 50.14 | 0.47 |
| penile blister | 3 | Reproductive system and breast disorders | 15.91 | 5.09 | 49.69 | 0.46 |
| interleukin-2 receptor increased | 3 | Investigations | 15.77 | 5.05 | 49.25 | 0.46 |
| factor viii deficiency | 3 | Congenital, familial and genetic disorders | 15.29 | 4.90 | 47.77 | 0.45 |
| rocky mountain spotted fever | 3 | Infections and infestations | 13.25 | 4.25 | 41.36 | 0.39 |
| salivary gland pain | 3 | Gastrointestinal disorders | 12.87 | 4.13 | 40.16 | 0.37 |
| scintillating scotoma | 3 | Eye disorders | 12.83 | 4.11 | 40.02 | 0.37 |
| babesiosis | 3 | Infections and infestations | 11.81 | 3.79 | 36.83 | 0.33 |
| gastric mucosal hypertrophy | 3 | Gastrointestinal disorders | 11.43 | 3.67 | 35.65 | 0.32 |
| chillblains | 3 | Injury, poisoning and procedural complications | 11.22 | 3.60 | 34.97 | 0.31 |
| distal intestinal obstruction syndrome | 3 | Gastrointestinal disorders | 10.62 | 3.41 | 33.10 | 0.28 |
| gastric mucosa erythema | 3 | Gastrointestinal disorders | 10.56 | 3.39 | 32.90 | 0.28 |
| hypnagogic hallucination | 3 | Psychiatric disorders | 10.34 | 3.32 | 32.23 | 0.27 |
| pharyngitis bacterial | 3 | Infections and infestations | 9.91 | 3.18 | 30.89 | 0.24 |
| penile erythema | 3 | Reproductive system and breast disorders | 9.89 | 3.17 | 30.80 | 0.24 |
| solar dermatitis | 3 | Skin and subcutaneous tissue disorders | 9.75 | 3.13 | 30.38 | 0.24 |
| mitral valve repair | 3 | Surgical and medical procedures | 8.99 | 2.89 | 28.00 | 0.19 |
| oesophageal fistula | 3 | Gastrointestinal disorders | 8.97 | 2.88 | 27.93 | 0.19 |
| porphyria | 3 | Congenital, familial and genetic disorders | 7.78 | 2.50 | 24.21 | 0.10 |
| gastrointestinal candidiasis | 3 | Infections and infestations | 7.47 | 2.40 | 23.25 | 0.08 |
| polyserositis | 3 | General disorders and administration site conditions | 7.46 | 2.40 | 23.20 | 0.08 |
| enlarged uvula | 3 | Gastrointestinal disorders | 7.42 | 2.39 | 23.10 | 0.07 |
| Minocycline | arthralgia | 269 | Musculoskeletal and connective tissue disorders | 2.22 | 1.97 | 2.51 | 0.92 |
| drug reaction with eosinophilia and systemic symptoms | 257 | Skin and subcutaneous tissue disorders | 43.58 | 38.40 | 49.45 | 5.06 |
| pyrexia | 240 | General disorders and administration site conditions | 2.27 | 1.99 | 2.59 | 0.94 |
| headache | 230 | Nervous system disorders | 1.27 | 1.11 | 1.45 | 0.13 |
| polyarteritis nodosa | 205 | Vascular disorders | 1867.98 | 1579.60 | 2209.00 | 8.05 |
| lupus-like syndrome | 192 | Musculoskeletal and connective tissue disorders | 83.43 | 72.11 | 96.53 | 5.81 |
| skin hyperpigmentation | 177 | Skin and subcutaneous tissue disorders | 81.20 | 69.78 | 94.50 | 5.76 |
| rash | 159 | Skin and subcutaneous tissue disorders | 1.38 | 1.18 | 1.61 | 0.21 |
| pigmentation disorder | 157 | Skin and subcutaneous tissue disorders | 86.04 | 73.27 | 101.05 | 5.78 |
| urticaria | 136 | Skin and subcutaneous tissue disorders | 3.17 | 2.67 | 3.76 | 1.37 |
| drug-induced liver injury | 136 | Hepatobiliary disorders | 19.15 | 16.14 | 22.72 | 3.87 |
| autoimmune hepatitis | 126 | Hepatobiliary disorders | 64.23 | 53.73 | 76.77 | 5.37 |
| drug hypersensitivity | 125 | Immune system disorders | 2.22 | 1.86 | 2.65 | 0.85 |
| benign intracranial hypertension | 112 | Nervous system disorders | 276.09 | 227.49 | 335.08 | 6.61 |
| vasculitis | 111 | Vascular disorders | 30.75 | 25.46 | 37.15 | 4.44 |
| skin discolouration | 101 | Skin and subcutaneous tissue disorders | 7.70 | 6.32 | 9.38 | 2.57 |
| myalgia | 97 | Musculoskeletal and connective tissue disorders | 1.99 | 1.63 | 2.43 | 0.67 |
| lymphadenopathy | 91 | Blood and lymphatic system disorders | 8.28 | 6.72 | 10.19 | 2.65 |
| hypersensitivity | 89 | Immune system disorders | 1.73 | 1.40 | 2.13 | 0.45 |
| alanine aminotransferase increased | 83 | Investigations | 4.09 | 3.29 | 5.09 | 1.66 |
| joint swelling | 83 | Musculoskeletal and connective tissue disorders | 2.27 | 1.83 | 2.82 | 0.83 |
| drug rash with eosinophilia and systemic symptoms | 83 | Skin and subcutaneous tissue disorders | 66.56 | 53.48 | 82.84 | 5.21 |
| hepatitis | 82 | Hepatobiliary disorders | 10.86 | 8.72 | 13.51 | 3.00 |
| hyperthyroidism | 82 | Endocrine disorders | 19.07 | 15.32 | 23.73 | 3.75 |
| papilloedema | 78 | Eye disorders | 59.15 | 47.21 | 74.11 | 5.06 |
| arthritis | 77 | Musculoskeletal and connective tissue disorders | 3.04 | 2.43 | 3.81 | 1.23 |
| neuropathy peripheral | 77 | Nervous system disorders | 2.86 | 2.29 | 3.59 | 1.14 |
| thyroiditis | 77 | Endocrine disorders | 87.93 | 70.03 | 110.41 | 5.44 |
| aspartate aminotransferase increased | 71 | Investigations | 4.01 | 3.17 | 5.07 | 1.60 |
| intracranial pressure increased | 67 | Nervous system disorders | 42.29 | 33.19 | 53.90 | 4.62 |
| treatment failure | 67 | General disorders and administration site conditions | 3.18 | 2.50 | 4.05 | 1.27 |
| eosinophilia | 65 | Blood and lymphatic system disorders | 13.23 | 10.35 | 16.90 | 3.20 |
| bone hyperpigmentation | 65 | Musculoskeletal and connective tissue disorders | 9961.90 | 6315.70 | 15713.15 | 6.59 |
| systemic lupus erythematosus | 64 | Musculoskeletal and connective tissue disorders | 6.54 | 5.11 | 8.37 | 2.26 |
| acute kidney injury | 61 | Renal and urinary disorders | 1.41 | 1.10 | 1.82 | 0.10 |
| drug intolerance | 58 | General disorders and administration site conditions | 2.11 | 1.63 | 2.74 | 0.66 |
| idiopathic intracranial hypertension | 57 | Nervous system disorders | 104.14 | 79.93 | 135.68 | 5.35 |
| vasculitis necrotising | 56 | Vascular disorders | 266.39 | 202.93 | 349.69 | 5.88 |
| eosinophilic myocarditis | 56 | Cardiac disorders | 321.36 | 244.39 | 422.58 | 5.95 |
| rheumatoid arthritis | 55 | Musculoskeletal and connective tissue disorders | 1.56 | 1.20 | 2.04 | 0.22 |
| vision blurred | 54 | Eye disorders | 1.41 | 1.08 | 1.85 | 0.08 |
| autoimmune disorder | 53 | Immune system disorders | 19.96 | 15.22 | 26.19 | 3.65 |
| thyroid disorder | 52 | Endocrine disorders | 10.67 | 8.11 | 14.02 | 2.86 |
| eosinophilic pneumonia acute | 52 | Respiratory, thoracic and mediastinal disorders | 279.21 | 210.46 | 370.42 | 5.81 |
| transaminases increased | 51 | Investigations | 7.92 | 6.01 | 10.45 | 2.46 |
| antinuclear antibody positive | 50 | Investigations | 45.62 | 34.47 | 60.38 | 4.54 |
| hepatic enzyme increased | 50 | Investigations | 2.51 | 1.90 | 3.32 | 0.87 |
| abortion spontaneous | 50 | Pregnancy, puerperium and perinatal conditions | 4.23 | 3.20 | 5.59 | 1.60 |
| scleral pigmentation | 49 | Eye disorders | 3671.27 | 2486.89 | 5419.71 | 6.12 |
| diplopia | 47 | Eye disorders | 6.06 | 4.55 | 8.08 | 2.07 |
| joint stiffness | 43 | Musculoskeletal and connective tissue disorders | 5.41 | 4.01 | 7.31 | 1.89 |
| anti-neutrophil cytoplasmic antibody positive vasculitis | 42 | Immune system disorders | 78.14 | 57.50 | 106.19 | 4.87 |
| myocarditis | 41 | Cardiac disorders | 13.87 | 10.19 | 18.87 | 3.10 |
| musculoskeletal stiffness | 40 | Musculoskeletal and connective tissue disorders | 1.45 | 1.06 | 1.98 | 0.05 |
| scleral discolouration | 40 | Eye disorders | 203.50 | 147.91 | 279.98 | 5.36 |
| blindness | 40 | Eye disorders | 3.40 | 2.49 | 4.64 | 1.24 |
| tachycardia | 39 | Cardiac disorders | 1.52 | 1.11 | 2.08 | 0.10 |
| tooth discolouration | 39 | Gastrointestinal disorders | 48.47 | 35.30 | 66.55 | 4.42 |
| hepatic function abnormal | 39 | Hepatobiliary disorders | 3.25 | 2.37 | 4.45 | 1.17 |
| ochronosis | 39 | Musculoskeletal and connective tissue disorders | 4545.10 | 2867.01 | 7205.41 | 5.77 |
| red blood cell sedimentation rate increased | 38 | Investigations | 9.94 | 7.22 | 13.69 | 2.65 |
| mononeuropathy multiplex | 38 | Nervous system disorders | 275.70 | 198.19 | 383.53 | 5.40 |
| tinnitus | 38 | Ear and labyrinth disorders | 2.91 | 2.11 | 4.00 | 1.01 |
| c-reactive protein increased | 37 | Investigations | 2.95 | 2.13 | 4.07 | 1.02 |
| papillary thyroid cancer | 37 | Neoplasms benign, malignant and unspecified (incl cysts and polyps) | 79.55 | 57.38 | 110.29 | 4.76 |
| drug ineffective for unapproved indication | 37 | General disorders and administration site conditions | 2.79 | 2.02 | 3.85 | 0.94 |
| multiple organ dysfunction syndrome | 36 | General disorders and administration site conditions | 5.29 | 3.81 | 7.35 | 1.81 |
| face oedema | 34 | General disorders and administration site conditions | 6.79 | 4.85 | 9.52 | 2.12 |
| pleural effusion | 34 | Respiratory, thoracic and mediastinal disorders | 1.71 | 1.22 | 2.39 | 0.24 |
| exposure during pregnancy | 33 | Injury, poisoning and procedural complications | 2.02 | 1.43 | 2.84 | 0.46 |
| interstitial lung disease | 32 | Respiratory, thoracic and mediastinal disorders | 2.09 | 1.48 | 2.96 | 0.50 |
| shock | 30 | Vascular disorders | 4.48 | 3.13 | 6.41 | 1.52 |
| multi-organ failure | 30 | General disorders and administration site conditions | 4.25 | 2.97 | 6.09 | 1.45 |
| splenomegaly | 29 | Blood and lymphatic system disorders | 7.41 | 5.14 | 10.67 | 2.17 |
| jaundice | 29 | Hepatobiliary disorders | 3.38 | 2.34 | 4.87 | 1.13 |
| autoimmune thyroiditis | 29 | Endocrine disorders | 25.67 | 17.80 | 37.02 | 3.60 |
| osteoporosis | 29 | Musculoskeletal and connective tissue disorders | 1.86 | 1.29 | 2.67 | 0.30 |
| foot deformity | 29 | Musculoskeletal and connective tissue disorders | 7.64 | 5.30 | 11.01 | 2.21 |
| vertigo | 28 | Ear and labyrinth disorders | 1.52 | 1.05 | 2.20 | 0.01 |
| acute hepatic failure | 28 | Hepatobiliary disorders | 7.67 | 5.29 | 11.13 | 2.20 |
| type 1 diabetes mellitus | 28 | Metabolism and nutrition disorders | 15.64 | 10.78 | 22.69 | 3.05 |
| liver disorder | 27 | Hepatobiliary disorders | 1.90 | 1.30 | 2.78 | 0.32 |
| neck pain | 27 | Musculoskeletal and connective tissue disorders | 1.53 | 1.05 | 2.23 | 0.01 |
| exostosis | 27 | Musculoskeletal and connective tissue disorders | 7.86 | 5.38 | 11.48 | 2.21 |
| rash erythematous | 26 | Skin and subcutaneous tissue disorders | 2.21 | 1.50 | 3.25 | 0.51 |
| liver function test abnormal | 26 | Investigations | 2.74 | 1.86 | 4.03 | 0.81 |
| leukocytosis | 26 | Blood and lymphatic system disorders | 4.68 | 3.18 | 6.89 | 1.53 |
| blood alkaline phosphatase increased | 25 | Investigations | 2.85 | 1.92 | 4.22 | 0.85 |
| hepatic failure | 25 | Hepatobiliary disorders | 2.68 | 1.81 | 3.97 | 0.76 |
| joint dislocation | 25 | Injury, poisoning and procedural complications | 7.19 | 4.85 | 10.66 | 2.07 |
| osteoarthritis | 25 | Musculoskeletal and connective tissue disorders | 1.62 | 1.09 | 2.40 | 0.07 |
| night sweats | 24 | Skin and subcutaneous tissue disorders | 2.56 | 1.71 | 3.82 | 0.68 |
| stevens-johnson syndrome | 24 | Skin and subcutaneous tissue disorders | 3.53 | 2.36 | 5.27 | 1.12 |
| rash maculo-papular | 24 | Skin and subcutaneous tissue disorders | 3.99 | 2.67 | 5.95 | 1.28 |
| skin lesion | 24 | Skin and subcutaneous tissue disorders | 2.81 | 1.88 | 4.19 | 0.81 |
| acute febrile neutrophilic dermatosis | 24 | Skin and subcutaneous tissue disorders | 38.76 | 25.90 | 58.01 | 3.82 |
| lip swelling | 24 | Gastrointestinal disorders | 2.76 | 1.85 | 4.12 | 0.79 |
| polyarthritis | 24 | Musculoskeletal and connective tissue disorders | 14.49 | 9.70 | 21.66 | 2.88 |
| bone erosion | 24 | Musculoskeletal and connective tissue disorders | 19.83 | 13.26 | 29.65 | 3.21 |
| conjunctival pigmentation | 23 | Eye disorders | 5045.64 | 2721.14 | 9355.83 | 4.89 |
| testicular pain | 23 | Reproductive system and breast disorders | 24.73 | 16.40 | 37.30 | 3.39 |
| liver injury | 22 | Hepatobiliary disorders | 3.76 | 2.47 | 5.72 | 1.17 |
| blood bilirubin increased | 21 | Investigations | 2.36 | 1.54 | 3.63 | 0.53 |
| serum sickness | 21 | Immune system disorders | 26.16 | 17.02 | 40.22 | 3.37 |
| nail discolouration | 21 | Skin and subcutaneous tissue disorders | 18.16 | 11.82 | 27.91 | 3.02 |
| hypothyroidism | 21 | Endocrine disorders | 2.05 | 1.33 | 3.14 | 0.33 |
| pericarditis | 21 | Cardiac disorders | 4.45 | 2.90 | 6.83 | 1.37 |
| pemphigoid | 21 | Skin and subcutaneous tissue disorders | 11.02 | 7.17 | 16.93 | 2.49 |
| optic atrophy | 21 | Eye disorders | 42.09 | 27.36 | 64.77 | 3.75 |
| type 2 lepra reaction | 21 | Infections and infestations | 463.06 | 294.37 | 728.41 | 4.62 |
| contraindicated product administered | 21 | Injury, poisoning and procedural complications | 2.09 | 1.36 | 3.20 | 0.36 |
| non-hodgkin's lymphoma | 21 | Neoplasms benign, malignant and unspecified (incl cysts and polyps) | 11.24 | 7.31 | 17.26 | 2.51 |
| dermatitis exfoliative | 20 | Skin and subcutaneous tissue disorders | 12.39 | 7.98 | 19.23 | 2.59 |
| synovitis | 20 | Musculoskeletal and connective tissue disorders | 3.23 | 2.08 | 5.02 | 0.93 |
| retinal pigmentation | 20 | Eye disorders | 54.88 | 35.27 | 85.40 | 3.87 |
| photophobia | 19 | Eye disorders | 3.61 | 2.30 | 5.66 | 1.05 |
| rash generalised | 19 | Skin and subcutaneous tissue disorders | 2.38 | 1.51 | 3.73 | 0.49 |
| antineutrophil cytoplasmic antibody positive | 19 | Investigations | 95.00 | 60.22 | 149.89 | 4.09 |
| cardiogenic shock | 19 | Cardiac disorders | 4.88 | 3.11 | 7.66 | 1.44 |
| organising pneumonia | 19 | Respiratory, thoracic and mediastinal disorders | 14.18 | 9.03 | 22.27 | 2.70 |
| serum sickness-like reaction | 19 | Immune system disorders | 129.02 | 81.62 | 203.94 | 4.20 |
| meningitis aseptic | 19 | Infections and infestations | 15.31 | 9.75 | 24.04 | 2.78 |
| photosensitivity reaction | 18 | Skin and subcutaneous tissue disorders | 3.66 | 2.30 | 5.82 | 1.05 |
| bone disorder | 18 | Musculoskeletal and connective tissue disorders | 2.38 | 1.50 | 3.78 | 0.48 |
| chronic hepatitis | 18 | Hepatobiliary disorders | 72.37 | 45.37 | 115.46 | 3.89 |
| ascites | 18 | Gastrointestinal disorders | 1.92 | 1.21 | 3.05 | 0.18 |
| livedo reticularis | 18 | Skin and subcutaneous tissue disorders | 29.42 | 18.49 | 46.82 | 3.33 |
| thyroid cancer | 18 | Neoplasms benign, malignant and unspecified (incl cysts and polyps) | 5.15 | 3.24 | 8.18 | 1.49 |
| basedow's disease | 18 | Endocrine disorders | 21.98 | 13.82 | 34.97 | 3.08 |
| peroneal nerve palsy | 18 | Nervous system disorders | 9.66 | 6.08 | 15.35 | 2.24 |
| ischaemic stroke | 18 | Nervous system disorders | 3.52 | 2.21 | 5.59 | 0.99 |
| eosinophilic pneumonia | 17 | Respiratory, thoracic and mediastinal disorders | 19.49 | 12.09 | 31.41 | 2.92 |
| chromaturia | 17 | Renal and urinary disorders | 2.60 | 1.61 | 4.19 | 0.57 |
| tubulointerstitial nephritis | 17 | Renal and urinary disorders | 3.05 | 1.89 | 4.91 | 0.78 |
| depersonalisation/derealisation disorder | 17 | Psychiatric disorders | 47.78 | 29.59 | 77.15 | 3.60 |
| pancreatitis acute | 16 | Gastrointestinal disorders | 2.50 | 1.53 | 4.08 | 0.49 |
| pneumonitis | 16 | Respiratory, thoracic and mediastinal disorders | 2.08 | 1.27 | 3.40 | 0.24 |
| scar | 16 | Injury, poisoning and procedural complications | 2.86 | 1.75 | 4.67 | 0.67 |
| thyroiditis acute | 16 | Endocrine disorders | 420.57 | 250.97 | 704.77 | 4.16 |
| hepatic necrosis | 15 | Hepatobiliary disorders | 12.17 | 7.33 | 20.22 | 2.36 |
| hepatic cirrhosis | 15 | Hepatobiliary disorders | 2.76 | 1.66 | 4.58 | 0.59 |
| erythema nodosum | 15 | Skin and subcutaneous tissue disorders | 12.40 | 7.46 | 20.60 | 2.38 |
| hepatitis acute | 15 | Hepatobiliary disorders | 7.88 | 4.75 | 13.09 | 1.89 |
| vanishing bile duct syndrome | 15 | Hepatobiliary disorders | 54.70 | 32.83 | 91.12 | 3.52 |
| haemophagocytic lymphohistiocytosis | 15 | Immune system disorders | 9.29 | 5.59 | 15.44 | 2.08 |
| glomerulonephritis rapidly progressive | 14 | Renal and urinary disorders | 49.66 | 29.29 | 84.19 | 3.38 |
| pericardial effusion | 14 | Cardiac disorders | 2.01 | 1.19 | 3.40 | 0.13 |
| acute respiratory distress syndrome | 14 | Respiratory, thoracic and mediastinal disorders | 2.63 | 1.56 | 4.45 | 0.49 |
| arteritis | 14 | Vascular disorders | 72.50 | 42.70 | 123.10 | 3.56 |
| pharyngitis | 13 | Infections and infestations | 2.85 | 1.66 | 4.92 | 0.56 |
| agranulocytosis | 13 | Blood and lymphatic system disorders | 2.63 | 1.53 | 4.53 | 0.45 |
| goitre | 13 | Endocrine disorders | 8.63 | 5.00 | 14.88 | 1.89 |
| mononeuropathy | 13 | Nervous system disorders | 197.01 | 112.79 | 344.14 | 3.71 |
| acute respiratory failure | 12 | Respiratory, thoracic and mediastinal disorders | 2.25 | 1.28 | 3.97 | 0.21 |
| ocular icterus | 12 | Hepatobiliary disorders | 9.06 | 5.14 | 15.98 | 1.88 |
| hepatitis cholestatic | 12 | Hepatobiliary disorders | 7.37 | 4.18 | 13.00 | 1.66 |
| eyelid oedema | 12 | Eye disorders | 3.46 | 1.97 | 6.11 | 0.76 |
| gingival discolouration | 12 | Gastrointestinal disorders | 76.49 | 43.17 | 135.53 | 3.35 |
| generalised oedema | 12 | General disorders and administration site conditions | 3.15 | 1.79 | 5.56 | 0.64 |
| educational problem | 12 | Social circumstances | 26.26 | 14.87 | 46.36 | 2.81 |
| hepatic fibrosis | 12 | Hepatobiliary disorders | 11.95 | 6.77 | 21.07 | 2.16 |
| visual field defect | 12 | Eye disorders | 5.25 | 2.98 | 9.25 | 1.27 |
| testicular infarction | 12 | Reproductive system and breast disorders | 859.51 | 460.00 | 1606.01 | 3.70 |
| nail pigmentation | 12 | Skin and subcutaneous tissue disorders | 173.80 | 97.42 | 310.05 | 3.56 |
| normal pressure hydrocephalus | 12 | Nervous system disorders | 93.42 | 52.66 | 165.73 | 3.41 |
| antiphospholipid syndrome | 11 | Blood and lymphatic system disorders | 23.61 | 13.04 | 42.73 | 2.63 |
| vith nerve paralysis | 11 | Nervous system disorders | 31.69 | 17.50 | 57.40 | 2.82 |
| ejection fraction decreased | 11 | Investigations | 2.32 | 1.28 | 4.19 | 0.20 |
| infectious mononucleosis | 11 | Infections and infestations | 15.49 | 8.56 | 28.02 | 2.31 |
| myopathy | 10 | Musculoskeletal and connective tissue disorders | 3.81 | 2.05 | 7.09 | 0.76 |
| liver transplant | 10 | Surgical and medical procedures | 9.81 | 5.27 | 18.25 | 1.80 |
| erythema multiforme | 10 | Skin and subcutaneous tissue disorders | 3.50 | 1.88 | 6.51 | 0.66 |
| toxic epidermal necrolysis | 10 | Skin and subcutaneous tissue disorders | 2.23 | 1.20 | 4.15 | 0.09 |
| tachypnoea | 10 | Respiratory, thoracic and mediastinal disorders | 2.62 | 1.41 | 4.88 | 0.30 |
| hepatomegaly | 10 | Hepatobiliary disorders | 2.97 | 1.60 | 5.53 | 0.46 |
| lymphocytosis | 10 | Blood and lymphatic system disorders | 15.28 | 8.21 | 28.46 | 2.20 |
| bacteraemia | 10 | Infections and infestations | 2.92 | 1.57 | 5.44 | 0.44 |
| sinus tachycardia | 10 | Cardiac disorders | 2.23 | 1.20 | 4.15 | 0.09 |
| splenic infarction | 10 | Blood and lymphatic system disorders | 18.81 | 10.10 | 35.04 | 2.36 |
| iiird nerve paralysis | 10 | Nervous system disorders | 41.98 | 22.50 | 78.33 | 2.84 |
| haemolytic anaemia | 10 | Blood and lymphatic system disorders | 3.65 | 1.96 | 6.79 | 0.71 |
| rosacea | 9 | Skin and subcutaneous tissue disorders | 6.69 | 3.48 | 12.87 | 1.32 |
| no therapeutic response | 9 | General disorders and administration site conditions | 2.42 | 1.26 | 4.66 | 0.13 |
| hyperbilirubinaemia | 9 | Hepatobiliary disorders | 3.00 | 1.56 | 5.76 | 0.40 |
| aortic valve disease | 9 | Cardiac disorders | 16.52 | 8.58 | 31.81 | 2.14 |
| eye haemorrhage | 9 | Eye disorders | 2.21 | 1.15 | 4.26 | 0.02 |
| nocardiosis | 9 | Infections and infestations | 13.72 | 7.13 | 26.42 | 1.99 |
| antiphospholipid antibodies positive | 9 | Investigations | 46.80 | 24.24 | 90.36 | 2.73 |
| gingival hyperpigmentation | 9 | Gastrointestinal disorders | 2084.25 | 928.60 | 4678.09 | 3.19 |
| anti-cyclic citrullinated peptide antibody positive | 9 | Investigations | 4.40 | 2.29 | 8.47 | 0.86 |
| pemphigus | 9 | Skin and subcutaneous tissue disorders | 2.51 | 1.31 | 4.83 | 0.18 |
| hand deformity | 9 | Musculoskeletal and connective tissue disorders | 2.21 | 1.15 | 4.26 | 0.02 |
| pleuropericarditis | 9 | Cardiac disorders | 88.14 | 45.50 | 170.74 | 2.93 |
| prothrombin time prolonged | 8 | Investigations | 3.77 | 1.88 | 7.55 | 0.59 |
| anti-thyroid antibody positive | 8 | Investigations | 53.37 | 26.55 | 107.28 | 2.60 |
| petechiae | 8 | Skin and subcutaneous tissue disorders | 2.49 | 1.24 | 4.98 | 0.09 |
| retinal haemorrhage | 8 | Eye disorders | 3.63 | 1.81 | 7.26 | 0.54 |
| neutrophilia | 8 | Blood and lymphatic system disorders | 5.17 | 2.58 | 10.36 | 0.94 |
| antinuclear antibody increased | 8 | Investigations | 26.53 | 13.23 | 53.20 | 2.29 |
| odynophagia | 8 | Gastrointestinal disorders | 4.51 | 2.25 | 9.02 | 0.79 |
| deafness neurosensory | 8 | Ear and labyrinth disorders | 7.72 | 3.85 | 15.45 | 1.36 |
| rheumatoid factor positive | 8 | Investigations | 4.26 | 2.13 | 8.53 | 0.73 |
| rash pustular | 8 | Infections and infestations | 3.61 | 1.80 | 7.22 | 0.54 |
| chondropathy | 8 | Musculoskeletal and connective tissue disorders | 8.62 | 4.31 | 17.27 | 1.46 |
| coeliac disease | 8 | Gastrointestinal disorders | 2.82 | 1.41 | 5.64 | 0.24 |
| trichoglossia | 8 | Gastrointestinal disorders | 82.65 | 41.01 | 166.56 | 2.72 |
| c-reactive protein abnormal | 8 | Investigations | 3.78 | 1.89 | 7.57 | 0.59 |
| therapy partial responder | 8 | General disorders and administration site conditions | 2.79 | 1.39 | 5.58 | 0.23 |
| tendon injury | 8 | Injury, poisoning and procedural complications | 7.04 | 3.52 | 14.10 | 1.27 |
| visual disturbance | 7 | Eye disorders | 3.14 | 1.50 | 6.60 | 0.27 |
| pulmonary function test abnormal | 7 | Investigations | 12.63 | 6.01 | 26.55 | 1.64 |
| histone antibody positive | 7 | Investigations | 166.95 | 78.32 | 355.88 | 2.60 |
| hypertriglyceridaemia | 7 | Metabolism and nutrition disorders | 3.92 | 1.87 | 8.24 | 0.52 |
| arterial thrombosis | 7 | Vascular disorders | 11.92 | 5.67 | 25.05 | 1.59 |
| aortic valve incompetence | 7 | Cardiac disorders | 4.21 | 2.01 | 8.84 | 0.60 |
| dermatomyositis | 7 | Skin and subcutaneous tissue disorders | 9.37 | 4.46 | 19.68 | 1.40 |
| parotitis | 7 | Infections and infestations | 18.15 | 8.63 | 38.15 | 1.89 |
| conjunctival deposit | 7 | Eye disorders | 765.18 | 340.35 | 1720.31 | 2.69 |
| congestive cardiomyopathy | 7 | Cardiac disorders | 4.76 | 2.27 | 10.00 | 0.74 |
| renal aneurysm | 7 | Renal and urinary disorders | 95.65 | 45.17 | 202.55 | 2.52 |
| brain stem stroke | 7 | Nervous system disorders | 49.19 | 23.33 | 103.71 | 2.35 |
| melanocytic naevus | 7 | Neoplasms benign, malignant and unspecified (incl cysts and polyps) | 4.28 | 2.04 | 8.98 | 0.62 |
| cervical myelopathy | 7 | Nervous system disorders | 66.54 | 31.51 | 140.52 | 2.44 |
| chylothorax | 7 | Respiratory, thoracic and mediastinal disorders | 34.13 | 16.21 | 71.87 | 2.22 |
| symblepharon | 7 | Eye disorders | 90.61 | 42.81 | 191.80 | 2.51 |
| tissue discolouration | 7 | General disorders and administration site conditions | 573.89 | 259.54 | 1268.94 | 2.68 |
| derealisation | 6 | Psychiatric disorders | 10.50 | 4.71 | 23.40 | 1.31 |
| depersonalisation | 6 | Psychiatric disorders | 20.62 | 9.24 | 46.01 | 1.74 |
| panniculitis | 6 | Skin and subcutaneous tissue disorders | 7.32 | 3.28 | 16.31 | 1.01 |
| renal artery stenosis | 6 | Renal and urinary disorders | 11.93 | 5.35 | 26.59 | 1.40 |
| activated partial thromboplastin time prolonged | 6 | Investigations | 3.63 | 1.63 | 8.09 | 0.30 |
| optic nerve disorder | 6 | Eye disorders | 11.26 | 5.05 | 25.10 | 1.36 |
| post inflammatory pigmentation change | 6 | Skin and subcutaneous tissue disorders | 49.59 | 22.16 | 111.00 | 2.09 |
| mechanical urticaria | 6 | Skin and subcutaneous tissue disorders | 48.27 | 21.57 | 108.03 | 2.08 |
| fungaemia | 6 | Infections and infestations | 13.76 | 6.17 | 30.68 | 1.50 |
| skin mass | 6 | Skin and subcutaneous tissue disorders | 3.21 | 1.44 | 7.15 | 0.16 |
| dermatitis bullous | 6 | Skin and subcutaneous tissue disorders | 3.00 | 1.35 | 6.69 | 0.09 |
| pulmonary toxicity | 6 | Respiratory, thoracic and mediastinal disorders | 3.24 | 1.45 | 7.22 | 0.17 |
| cholestatic liver injury | 6 | Hepatobiliary disorders | 12.68 | 5.69 | 28.28 | 1.45 |
| rheumatic fever | 6 | Musculoskeletal and connective tissue disorders | 5.57 | 2.50 | 12.41 | 0.75 |
| intestinal infarction | 6 | Gastrointestinal disorders | 19.54 | 8.76 | 43.60 | 1.71 |
| apparent death | 6 | General disorders and administration site conditions | 5.10 | 2.29 | 11.37 | 0.66 |
| retinitis | 6 | Infections and infestations | 17.19 | 7.71 | 38.35 | 1.64 |
| phonophobia | 5 | Psychiatric disorders | 35.37 | 14.66 | 85.36 | 1.67 |
| hepatosplenomegaly | 5 | Hepatobiliary disorders | 6.03 | 2.51 | 14.50 | 0.62 |
| tongue discolouration | 5 | Gastrointestinal disorders | 3.82 | 1.59 | 9.18 | 0.18 |
| smooth muscle antibody positive | 5 | Investigations | 75.94 | 31.33 | 184.07 | 1.85 |
| human herpesvirus 6 infection | 5 | Infections and infestations | 8.80 | 3.66 | 21.18 | 0.94 |
| pseudomonal sepsis | 5 | Infections and infestations | 9.30 | 3.86 | 22.37 | 0.98 |
| polyserositis | 5 | General disorders and administration site conditions | 41.14 | 17.04 | 99.35 | 1.72 |
| areflexia | 5 | Nervous system disorders | 6.05 | 2.52 | 14.56 | 0.63 |
| cytotoxic oedema | 5 | Nervous system disorders | 71.78 | 29.63 | 173.91 | 1.84 |
| gastroenteritis eosinophilic | 5 | Gastrointestinal disorders | 48.44 | 20.04 | 117.07 | 1.76 |
| idiosyncratic drug reaction | 5 | General disorders and administration site conditions | 19.22 | 7.98 | 46.31 | 1.43 |
| retinal exudates | 5 | Eye disorders | 17.18 | 7.13 | 41.36 | 1.37 |
| normochromic normocytic anaemia | 5 | Blood and lymphatic system disorders | 4.93 | 2.05 | 11.86 | 0.44 |
| pupillary reflex impaired | 5 | Eye disorders | 9.58 | 3.98 | 23.05 | 1.00 |
| mitral valve disease | 5 | Cardiac disorders | 7.60 | 3.16 | 18.29 | 0.82 |
| pyoderma gangrenosum | 5 | Skin and subcutaneous tissue disorders | 4.68 | 1.95 | 11.26 | 0.39 |
| brain stem infarction | 5 | Nervous system disorders | 14.37 | 5.97 | 34.59 | 1.27 |
| onychomadesis | 5 | Skin and subcutaneous tissue disorders | 4.59 | 1.91 | 11.04 | 0.36 |
| melanosis | 5 | Skin and subcutaneous tissue disorders | 138.50 | 56.75 | 338.05 | 1.93 |
| polydipsia | 5 | Metabolism and nutrition disorders | 3.99 | 1.66 | 9.59 | 0.22 |
| adrenal suppression | 5 | Endocrine disorders | 20.07 | 8.33 | 48.35 | 1.45 |
| lateral medullary syndrome | 5 | Nervous system disorders | 213.78 | 86.87 | 526.07 | 1.97 |
| antineutrophil cytoplasmic antibody increased | 5 | Investigations | 111.75 | 45.92 | 271.95 | 1.91 |
| dermatitis exfoliative generalised | 5 | Skin and subcutaneous tissue disorders | 6.00 | 2.50 | 14.44 | 0.62 |
| pigment nephropathy | 5 | Renal and urinary disorders | 312.18 | 125.52 | 776.43 | 1.99 |
| faeces pale | 4 | Gastrointestinal disorders | 6.01 | 2.25 | 16.03 | 0.34 |
| no reaction on previous exposure to drug | 4 | General disorders and administration site conditions | 26.94 | 10.07 | 72.04 | 1.19 |
| scotoma | 4 | Eye disorders | 12.81 | 4.80 | 34.20 | 0.86 |
| strabismus | 4 | Eye disorders | 4.37 | 1.64 | 11.65 | 0.06 |
| csf pressure increased | 4 | Investigations | 46.00 | 17.16 | 123.31 | 1.33 |
| portal hypertension | 4 | Hepatobiliary disorders | 4.31 | 1.62 | 11.49 | 0.05 |
| blood immunoglobulin g increased | 4 | Investigations | 8.98 | 3.37 | 23.97 | 0.64 |
| osteoma cutis | 4 | Neoplasms benign, malignant and unspecified (incl cysts and polyps) | 436.97 | 155.47 | 1228.15 | 1.53 |
| hepatitis chronic active | 4 | Hepatobiliary disorders | 77.87 | 28.93 | 209.59 | 1.42 |
| exfoliative rash | 4 | Skin and subcutaneous tissue disorders | 5.35 | 2.00 | 14.26 | 0.24 |
| thyroxine free increased | 4 | Investigations | 19.89 | 7.44 | 53.14 | 1.07 |
| tri-iodothyronine free increased | 4 | Investigations | 76.36 | 28.38 | 205.48 | 1.42 |
| blood immunoglobulin e increased | 4 | Investigations | 4.90 | 1.84 | 13.07 | 0.17 |
| dyspnoea at rest | 4 | Respiratory, thoracic and mediastinal disorders | 4.45 | 1.67 | 11.86 | 0.08 |
| skin striae | 4 | Skin and subcutaneous tissue disorders | 9.93 | 3.72 | 26.50 | 0.71 |
| type iv hypersensitivity reaction | 4 | Immune system disorders | 5.62 | 2.11 | 14.98 | 0.28 |
| macule | 4 | Skin and subcutaneous tissue disorders | 4.69 | 1.76 | 12.50 | 0.13 |
| epididymitis | 4 | Infections and infestations | 9.70 | 3.63 | 25.88 | 0.69 |
| photoonycholysis | 4 | Skin and subcutaneous tissue disorders | 357.52 | 128.41 | 995.42 | 1.53 |
| salt craving | 4 | Metabolism and nutrition disorders | 65.00 | 24.19 | 174.67 | 1.39 |
| renal arteritis | 4 | Renal and urinary disorders | 507.44 | 179.05 | 1438.12 | 1.54 |
| myelopathy | 4 | Nervous system disorders | 6.67 | 2.50 | 17.79 | 0.42 |
| oral mucosal discolouration | 4 | Gastrointestinal disorders | 20.92 | 7.83 | 55.90 | 1.09 |
| testicular swelling | 4 | Reproductive system and breast disorders | 10.53 | 3.94 | 28.10 | 0.75 |
| aortic disorder | 4 | Vascular disorders | 12.34 | 4.62 | 32.94 | 0.84 |
| premature menopause | 4 | Reproductive system and breast disorders | 15.17 | 5.68 | 40.51 | 0.95 |
| mucosal pigmentation | 4 | General disorders and administration site conditions | 582.62 | 203.78 | 1665.72 | 1.54 |
| type 1 lepra reaction | 4 | Infections and infestations | 286.01 | 103.61 | 789.54 | 1.52 |
| herpes simplex encephalitis | 4 | Infections and infestations | 34.65 | 12.94 | 92.76 | 1.26 |
| jarisch-herxheimer reaction | 4 | Immune system disorders | 22.76 | 8.52 | 60.85 | 1.13 |
| oral pigmentation | 4 | Gastrointestinal disorders | 234.79 | 85.58 | 644.14 | 1.51 |
| metal poisoning | 4 | Injury, poisoning and procedural complications | 19.81 | 7.41 | 52.94 | 1.07 |
| eosinophilic pneumonia chronic | 4 | Respiratory, thoracic and mediastinal disorders | 44.31 | 16.53 | 118.77 | 1.32 |
| linear iga disease | 4 | Skin and subcutaneous tissue disorders | 9.89 | 3.71 | 26.40 | 0.71 |
| amyloidosis | 4 | Immune system disorders | 7.66 | 2.87 | 20.43 | 0.53 |
| brain stem ischaemia | 4 | Nervous system disorders | 66.37 | 24.70 | 178.39 | 1.40 |
| peyronie's disease | 4 | Reproductive system and breast disorders | 15.67 | 5.87 | 41.84 | 0.97 |
| venous thrombosis limb | 4 | Vascular disorders | 5.29 | 1.98 | 14.11 | 0.23 |
| cross sensitivity reaction | 4 | Immune system disorders | 25.21 | 9.43 | 67.41 | 1.16 |
| tracheal disorder | 4 | Respiratory, thoracic and mediastinal disorders | 23.41 | 8.76 | 62.58 | 1.14 |
| granulomatosis with polyangiitis | 4 | Vascular disorders | 11.73 | 4.39 | 31.31 | 0.81 |
| eosinophilic granulomatosis with polyangiitis | 4 | Immune system disorders | 7.57 | 2.84 | 20.21 | 0.52 |
| leukaemoid reaction | 4 | Blood and lymphatic system disorders | 57.83 | 21.54 | 155.27 | 1.37 |
| nodular vasculitis | 4 | Skin and subcutaneous tissue disorders | 238.34 | 86.84 | 654.18 | 1.51 |
| gilbert's syndrome | 3 | Congenital, familial and genetic disorders | 24.22 | 7.78 | 75.39 | 0.61 |
| myelitis transverse | 3 | Nervous system disorders | 7.19 | 2.32 | 22.33 | 0.06 |
| lymphomatoid papulosis | 3 | Skin and subcutaneous tissue disorders | 35.74 | 11.46 | 111.44 | 0.71 |
| systemic lupus erythematosus rash | 3 | Skin and subcutaneous tissue disorders | 11.42 | 3.68 | 35.47 | 0.32 |
| meningitis eosinophilic | 3 | Nervous system disorders | 406.74 | 123.86 | 1335.72 | 0.91 |
| fibromuscular dysplasia | 3 | Vascular disorders | 57.82 | 18.49 | 180.84 | 0.79 |
| alveolitis allergic | 3 | Respiratory, thoracic and mediastinal disorders | 8.36 | 2.69 | 25.96 | 0.15 |
| antineutrophil cytoplasmic antibody | 3 | Investigations | 129.62 | 41.02 | 409.56 | 0.86 |
| altered visual depth perception | 3 | Eye disorders | 11.84 | 3.81 | 36.79 | 0.34 |
| polyglandular disorder | 3 | Endocrine disorders | 173.46 | 54.56 | 551.49 | 0.88 |
| axonal neuropathy | 3 | Nervous system disorders | 12.16 | 3.91 | 37.78 | 0.35 |
| meningeal disorder | 3 | Nervous system disorders | 21.97 | 7.06 | 68.35 | 0.58 |
| subcutaneous emphysema | 3 | Skin and subcutaneous tissue disorders | 10.64 | 3.42 | 33.04 | 0.29 |
| renal tubular atrophy | 3 | Renal and urinary disorders | 11.87 | 3.82 | 36.87 | 0.34 |
| catabolic state | 3 | Metabolism and nutrition disorders | 151.22 | 47.71 | 479.28 | 0.87 |
| nail bed disorder | 3 | Skin and subcutaneous tissue disorders | 25.48 | 8.18 | 79.31 | 0.63 |
| varicocele | 3 | Reproductive system and breast disorders | 32.58 | 10.46 | 101.54 | 0.69 |
| hypermetropia | 3 | Eye disorders | 9.06 | 2.92 | 28.14 | 0.20 |
| subacute cutaneous lupus erythematosus | 3 | Skin and subcutaneous tissue disorders | 6.96 | 2.24 | 21.60 | 0.03 |
| retinal deposits | 3 | Eye disorders | 50.41 | 16.13 | 157.49 | 0.77 |
| detachment of retinal pigment epithelium | 3 | Eye disorders | 10.79 | 3.47 | 33.52 | 0.29 |
| encephalomyelitis | 3 | Infections and infestations | 37.21 | 11.93 | 116.03 | 0.71 |
| vein discolouration | 3 | Vascular disorders | 21.37 | 6.87 | 66.48 | 0.57 |
| conjunctival cyst | 3 | Eye disorders | 187.23 | 58.78 | 596.41 | 0.88 |
| thyroiditis subacute | 3 | Endocrine disorders | 30.64 | 9.83 | 95.45 | 0.67 |
| fixed eruption | 3 | Skin and subcutaneous tissue disorders | 7.59 | 2.45 | 23.58 | 0.09 |
| skin depigmentation | 3 | Skin and subcutaneous tissue disorders | 7.00 | 2.25 | 21.73 | 0.04 |
| intestinal sepsis | 3 | Infections and infestations | 35.00 | 11.23 | 109.11 | 0.70 |
| vascular pain | 3 | Vascular disorders | 11.45 | 3.69 | 35.58 | 0.32 |
| hypersensitivity myocarditis | 3 | Cardiac disorders | 100.82 | 32.04 | 317.25 | 0.85 |
| joint deposit | 3 | Musculoskeletal and connective tissue disorders | 166.13 | 52.31 | 527.64 | 0.88 |
| pancreatitis relapsing | 3 | Gastrointestinal disorders | 12.61 | 4.06 | 39.20 | 0.37 |
| giant cell myocarditis | 3 | Cardiac disorders | 421.27 | 128.03 | 1386.18 | 0.91 |
| ovarian failure | 3 | Reproductive system and breast disorders | 19.40 | 6.24 | 60.34 | 0.54 |
| somatic symptom disorder | 3 | Psychiatric disorders | 8.74 | 2.82 | 27.15 | 0.18 |
| gliosis | 3 | Nervous system disorders | 19.02 | 6.12 | 59.17 | 0.54 |
| pouchitis | 3 | Gastrointestinal disorders | 8.60 | 2.77 | 26.70 | 0.17 |
| Tigecycline | off label use | 225 | Injury, poisoning and procedural complications | 2.04 | 1.78 | 2.35 | 0.75 |
| nausea | 172 | Gastrointestinal disorders | 1.51 | 1.29 | 1.77 | 0.33 |
| coagulopathy | 145 | Blood and lymphatic system disorders | 58.70 | 49.60 | 69.46 | 5.28 |
| vomiting | 109 | Gastrointestinal disorders | 1.59 | 1.31 | 1.93 | 0.35 |
| pancreatitis | 109 | Gastrointestinal disorders | 13.83 | 11.41 | 16.76 | 3.36 |
| thrombocytopenia | 87 | Blood and lymphatic system disorders | 5.18 | 4.18 | 6.42 | 1.97 |
| platelet count decreased | 80 | Investigations | 4.57 | 3.66 | 5.71 | 1.79 |
| hypofibrinogenaemia | 79 | Blood and lymphatic system disorders | 661.51 | 523.91 | 835.26 | 6.63 |
| blood bilirubin increased | 75 | Investigations | 16.66 | 13.23 | 20.96 | 3.53 |
| pancreatitis acute | 70 | Gastrointestinal disorders | 21.58 | 17.01 | 27.38 | 3.84 |
| sepsis | 64 | Infections and infestations | 3.66 | 2.86 | 4.70 | 1.44 |
| condition aggravated | 64 | General disorders and administration site conditions | 1.40 | 1.09 | 1.79 | 0.09 |
| liver injury | 59 | Hepatobiliary disorders | 19.79 | 15.28 | 25.63 | 3.67 |
| pathogen resistance | 57 | Infections and infestations | 47.18 | 36.26 | 61.41 | 4.64 |
| septic shock | 54 | Infections and infestations | 8.43 | 6.43 | 11.04 | 2.54 |
| blood fibrinogen decreased | 53 | Investigations | 350.18 | 265.14 | 462.50 | 5.92 |
| alanine aminotransferase increased | 47 | Investigations | 4.46 | 3.34 | 5.95 | 1.64 |
| aspartate aminotransferase increased | 45 | Investigations | 4.90 | 3.64 | 6.58 | 1.76 |
| hepatic function abnormal | 42 | Hepatobiliary disorders | 6.77 | 4.99 | 9.19 | 2.18 |
| renal failure | 42 | Renal and urinary disorders | 1.74 | 1.28 | 2.37 | 0.31 |
| blood alkaline phosphatase increased | 40 | Investigations | 8.84 | 6.47 | 12.09 | 2.51 |
| multi-organ failure | 40 | General disorders and administration site conditions | 11.01 | 8.05 | 15.05 | 2.79 |
| haemorrhage | 39 | Vascular disorders | 2.49 | 1.81 | 3.42 | 0.79 |
| lipase increased | 39 | Investigations | 31.50 | 22.94 | 43.25 | 4.00 |
| drug-induced liver injury | 38 | Hepatobiliary disorders | 10.10 | 7.33 | 13.91 | 2.66 |
| hepatic enzyme increased | 37 | Investigations | 3.59 | 2.59 | 4.96 | 1.28 |
| hypoglycaemia | 31 | Metabolism and nutrition disorders | 4.22 | 2.96 | 6.01 | 1.45 |
| acinetobacter infection | 31 | Infections and infestations | 201.05 | 140.43 | 287.85 | 5.03 |
| drug resistance | 30 | General disorders and administration site conditions | 8.94 | 6.24 | 12.82 | 2.42 |
| hepatic failure | 29 | Hepatobiliary disorders | 6.01 | 4.17 | 8.67 | 1.89 |
| renal impairment | 28 | Renal and urinary disorders | 2.09 | 1.44 | 3.03 | 0.45 |
| cholestasis | 27 | Hepatobiliary disorders | 9.78 | 6.69 | 14.30 | 2.48 |
| activated partial thromboplastin time prolonged | 27 | Investigations | 31.77 | 21.73 | 46.46 | 3.75 |
| hepatotoxicity | 27 | Hepatobiliary disorders | 8.35 | 5.72 | 12.21 | 2.28 |
| pseudomonas infection | 25 | Infections and infestations | 19.13 | 12.90 | 28.39 | 3.20 |
| prothrombin time prolonged | 24 | Investigations | 21.93 | 14.66 | 32.80 | 3.31 |
| coagulation time prolonged | 24 | Investigations | 98.18 | 65.51 | 147.15 | 4.41 |
| amylase increased | 24 | Investigations | 43.84 | 29.29 | 65.61 | 3.92 |
| gamma-glutamyltransferase increased | 23 | Investigations | 5.66 | 3.75 | 8.53 | 1.72 |
| transaminases increased | 22 | Investigations | 6.54 | 4.30 | 9.96 | 1.88 |
| blood urea increased | 21 | Investigations | 6.89 | 4.48 | 10.59 | 1.92 |
| jaundice | 21 | Hepatobiliary disorders | 4.71 | 3.06 | 7.23 | 1.44 |
| international normalised ratio increased | 20 | Investigations | 4.47 | 2.88 | 6.95 | 1.35 |
| liver function test abnormal | 20 | Investigations | 4.06 | 2.61 | 6.30 | 1.23 |
| treatment failure | 20 | General disorders and administration site conditions | 1.81 | 1.17 | 2.81 | 0.14 |
| leukopenia | 19 | Blood and lymphatic system disorders | 2.42 | 1.54 | 3.80 | 0.52 |
| encephalopathy | 17 | Nervous system disorders | 4.73 | 2.93 | 7.62 | 1.34 |
| acute hepatic failure | 17 | Hepatobiliary disorders | 8.95 | 5.55 | 14.42 | 2.11 |
| superinfection | 17 | Infections and infestations | 68.94 | 42.69 | 111.32 | 3.80 |
| white blood cell count increased | 16 | Investigations | 2.40 | 1.47 | 3.92 | 0.43 |
| staphylococcal infection | 16 | Infections and infestations | 2.89 | 1.77 | 4.73 | 0.68 |
| hyperbilirubinaemia | 15 | Hepatobiliary disorders | 9.63 | 5.79 | 16.00 | 2.11 |
| hepatitis cholestatic | 15 | Hepatobiliary disorders | 17.77 | 10.69 | 29.53 | 2.73 |
| klebsiella infection | 14 | Infections and infestations | 18.26 | 10.79 | 30.90 | 2.69 |
| drug ineffective for unapproved indication | 14 | General disorders and administration site conditions | 2.02 | 1.19 | 3.41 | 0.14 |
| hepatitis | 13 | Hepatobiliary disorders | 3.26 | 1.89 | 5.62 | 0.73 |
| bacteraemia | 13 | Infections and infestations | 7.32 | 4.24 | 12.62 | 1.71 |
| drug reaction with eosinophilia and systemic symptoms | 13 | Skin and subcutaneous tissue disorders | 3.98 | 2.31 | 6.87 | 0.98 |
| disseminated intravascular coagulation | 12 | Blood and lymphatic system disorders | 4.59 | 2.61 | 8.10 | 1.11 |
| leukocytosis | 12 | Blood and lymphatic system disorders | 4.14 | 2.35 | 7.31 | 0.98 |
| metabolic acidosis | 12 | Metabolism and nutrition disorders | 2.64 | 1.49 | 4.65 | 0.41 |
| toxic epidermal necrolysis | 12 | Skin and subcutaneous tissue disorders | 5.15 | 2.92 | 9.09 | 1.25 |
| shock haemorrhagic | 12 | Vascular disorders | 10.15 | 5.75 | 17.90 | 1.99 |
| pneumonia bacterial | 12 | Infections and infestations | 8.59 | 4.87 | 15.16 | 1.82 |
| hepatic steatosis | 12 | Hepatobiliary disorders | 3.68 | 2.09 | 6.49 | 0.83 |
| multiple organ dysfunction syndrome | 12 | General disorders and administration site conditions | 3.37 | 1.91 | 5.95 | 0.73 |
| pancreatitis necrotising | 11 | Gastrointestinal disorders | 36.94 | 20.40 | 66.89 | 2.91 |
| acinetobacter bacteraemia | 11 | Infections and infestations | 425.26 | 231.38 | 781.58 | 3.51 |
| enterococcal infection | 11 | Infections and infestations | 14.17 | 7.83 | 25.63 | 2.23 |
| bone marrow failure | 11 | Blood and lymphatic system disorders | 3.30 | 1.82 | 5.96 | 0.64 |
| clostridium difficile colitis | 11 | Infections and infestations | 6.55 | 3.62 | 11.85 | 1.46 |
| dysbiosis | 11 | Gastrointestinal disorders | 117.56 | 64.72 | 213.53 | 3.34 |
| myelosuppression | 11 | Blood and lymphatic system disorders | 3.87 | 2.14 | 7.01 | 0.84 |
| stevens-johnson syndrome | 10 | Skin and subcutaneous tissue disorders | 2.82 | 1.52 | 5.25 | 0.39 |
| jaundice cholestatic | 10 | Hepatobiliary disorders | 17.86 | 9.59 | 33.25 | 2.32 |
| bilirubin conjugated increased | 10 | Investigations | 25.54 | 13.71 | 47.58 | 2.57 |
| clostridium difficile infection | 10 | Infections and infestations | 3.10 | 1.67 | 5.77 | 0.51 |
| shock | 9 | Vascular disorders | 2.57 | 1.34 | 4.95 | 0.20 |
| bronchospasm | 9 | Respiratory, thoracic and mediastinal disorders | 4.08 | 2.12 | 7.85 | 0.77 |
| abdominal abscess | 8 | Infections and infestations | 10.68 | 5.33 | 21.39 | 1.66 |
| pseudomembranous colitis | 8 | Infections and infestations | 19.97 | 9.97 | 40.02 | 2.13 |
| klebsiella bacteraemia | 8 | Infections and infestations | 64.68 | 32.21 | 129.87 | 2.66 |
| cholestatic liver injury | 8 | Hepatobiliary disorders | 32.56 | 16.24 | 65.29 | 2.40 |
| generalised oedema | 7 | General disorders and administration site conditions | 3.53 | 1.68 | 7.42 | 0.40 |
| hypertriglyceridaemia | 7 | Metabolism and nutrition disorders | 7.54 | 3.59 | 15.84 | 1.20 |
| hypoalbuminaemia | 7 | Metabolism and nutrition disorders | 5.40 | 2.57 | 11.34 | 0.87 |
| agranulocytosis | 7 | Blood and lymphatic system disorders | 2.72 | 1.29 | 5.71 | 0.09 |
| acute respiratory failure | 7 | Respiratory, thoracic and mediastinal disorders | 2.52 | 1.20 | 5.30 | 0.00 |
| hepatocellular injury | 7 | Hepatobiliary disorders | 3.37 | 1.60 | 7.07 | 0.35 |
| prothrombin level decreased | 7 | Investigations | 42.46 | 20.18 | 89.35 | 2.30 |
| candida infection | 7 | Infections and infestations | 2.98 | 1.42 | 6.26 | 0.21 |
| thrombin time prolonged | 7 | Investigations | 196.85 | 92.85 | 417.34 | 2.62 |
| dermatitis allergic | 6 | Skin and subcutaneous tissue disorders | 3.43 | 1.54 | 7.65 | 0.24 |
| abdominal infection | 6 | Infections and infestations | 14.94 | 6.70 | 33.31 | 1.56 |
| immunosuppressant drug level increased | 6 | Investigations | 12.57 | 5.64 | 28.03 | 1.44 |
| clostridial infection | 6 | Infections and infestations | 8.71 | 3.91 | 19.42 | 1.16 |
| infusion site extravasation | 6 | General disorders and administration site conditions | 5.49 | 2.46 | 12.23 | 0.73 |
| fibrin d dimer increased | 6 | Investigations | 10.13 | 4.54 | 22.59 | 1.28 |
| blood albumin decreased | 5 | Investigations | 3.51 | 1.46 | 8.44 | 0.09 |
| klebsiella sepsis | 5 | Infections and infestations | 29.09 | 12.08 | 70.08 | 1.61 |
| lung infection pseudomonal | 5 | Infections and infestations | 43.79 | 18.16 | 105.57 | 1.74 |
| blood amylase increased | 5 | Investigations | 12.81 | 5.32 | 30.84 | 1.20 |
| fungaemia | 5 | Infections and infestations | 22.01 | 9.14 | 52.99 | 1.49 |
| escherichia infection | 5 | Infections and infestations | 3.91 | 1.63 | 9.41 | 0.20 |
| nephropathy toxic | 5 | Renal and urinary disorders | 3.36 | 1.40 | 8.09 | 0.04 |
| anuria | 5 | Renal and urinary disorders | 3.58 | 1.49 | 8.61 | 0.11 |
| yellow skin | 5 | Skin and subcutaneous tissue disorders | 6.73 | 2.80 | 16.18 | 0.72 |
| methaemoglobinaemia | 5 | Blood and lymphatic system disorders | 18.51 | 7.69 | 44.55 | 1.41 |
| azotaemia | 4 | Renal and urinary disorders | 6.17 | 2.31 | 16.47 | 0.36 |
| pancreatitis haemorrhagic | 4 | Gastrointestinal disorders | 49.95 | 18.67 | 133.64 | 1.35 |
| renal tubular disorder | 4 | Renal and urinary disorders | 8.67 | 3.25 | 23.13 | 0.62 |
| lung abscess | 4 | Infections and infestations | 12.09 | 4.53 | 32.26 | 0.83 |
| systemic inflammatory response syndrome | 4 | General disorders and administration site conditions | 6.35 | 2.38 | 16.95 | 0.39 |
| proteus infection | 4 | Infections and infestations | 32.92 | 12.32 | 87.97 | 1.25 |
| pancreatic enzymes increased | 4 | Investigations | 17.30 | 6.48 | 46.18 | 1.01 |
| oedematous pancreatitis | 4 | Gastrointestinal disorders | 51.84 | 19.37 | 138.69 | 1.36 |
| coagulation factor decreased | 4 | Investigations | 90.21 | 33.63 | 241.97 | 1.44 |
| disorganised speech | 4 | Psychiatric disorders | 18.01 | 6.75 | 48.08 | 1.03 |
| deafness neurosensory | 4 | Ear and labyrinth disorders | 7.40 | 2.77 | 19.74 | 0.50 |
| barrett's oesophagus | 4 | Gastrointestinal disorders | 6.66 | 2.50 | 17.76 | 0.42 |
| procalcitonin increased | 4 | Investigations | 25.96 | 9.72 | 69.35 | 1.17 |
| pancreatic injury | 3 | Injury, poisoning and procedural complications | 70.36 | 22.56 | 219.47 | 0.81 |
| serratia bacteraemia | 3 | Infections and infestations | 161.84 | 51.53 | 508.24 | 0.88 |
| pseudomonal bacteraemia | 3 | Infections and infestations | 24.98 | 8.04 | 77.65 | 0.62 |
| pneumonia klebsiella | 3 | Infections and infestations | 10.72 | 3.45 | 33.29 | 0.29 |
| multiple-drug resistance | 3 | General disorders and administration site conditions | 7.06 | 2.28 | 21.93 | 0.04 |
| stenotrophomonas infection | 3 | Infections and infestations | 15.28 | 4.92 | 47.46 | 0.45 |
| diabetes insipidus | 3 | Endocrine disorders | 8.06 | 2.60 | 25.03 | 0.13 |
| acinetobacter test positive | 3 | Investigations | 90.63 | 29.01 | 283.11 | 0.84 |
| prothrombin time ratio decreased | 3 | Investigations | 34.12 | 10.97 | 106.14 | 0.70 |
| systemic candida | 3 | Infections and infestations | 8.73 | 2.81 | 27.12 | 0.18 |
| dyssomnia | 3 | Psychiatric disorders | 96.00 | 30.72 | 300.03 | 0.84 |
| ototoxicity | 3 | Ear and labyrinth disorders | 12.26 | 3.95 | 38.07 | 0.36 |
| microangiopathic haemolytic anaemia | 3 | Blood and lymphatic system disorders | 25.23 | 8.12 | 78.43 | 0.62 |
| eosinophilic pneumonia acute | 3 | Respiratory, thoracic and mediastinal disorders | 28.72 | 9.23 | 89.29 | 0.66 |
| Tetracycline | drug hypersensitivity | 838 | Immune system disorders | 105.19 | 94.92 | 116.57 | 5.37 |
| tooth discolouration | 128 | Gastrointestinal disorders | 559.59 | 465.25 | 673.06 | 7.13 |
| rash | 103 | Skin and subcutaneous tissue disorders | 2.92 | 2.39 | 3.56 | 1.16 |
| hypersensitivity | 88 | Immune system disorders | 5.61 | 4.52 | 6.96 | 2.06 |
| urticaria | 55 | Skin and subcutaneous tissue disorders | 4.07 | 3.11 | 5.33 | 1.54 |
| tooth disorder | 39 | Gastrointestinal disorders | 15.62 | 11.37 | 21.48 | 3.20 |
| anaphylactic reaction | 23 | Immune system disorders | 5.08 | 3.37 | 7.67 | 1.57 |
| liver disorder | 18 | Hepatobiliary disorders | 4.02 | 2.53 | 6.40 | 1.16 |
| intracranial pressure increased | 15 | Nervous system disorders | 29.47 | 17.71 | 49.03 | 3.14 |
| papilloedema | 15 | Eye disorders | 35.18 | 21.14 | 58.55 | 3.26 |
| maternal exposure during pregnancy | 15 | Injury, poisoning and procedural complications | 1.99 | 1.20 | 3.31 | 0.15 |
| benign intracranial hypertension | 14 | Nervous system disorders | 101.08 | 59.59 | 171.46 | 3.68 |
| tooth fracture | 12 | Injury, poisoning and procedural complications | 9.47 | 5.37 | 16.72 | 1.92 |
| tooth loss | 10 | Gastrointestinal disorders | 3.64 | 1.95 | 6.78 | 0.70 |
| swollen tongue | 10 | Gastrointestinal disorders | 3.69 | 1.98 | 6.87 | 0.72 |
| premature baby | 10 | Pregnancy, puerperium and perinatal conditions | 3.57 | 1.92 | 6.65 | 0.68 |
| tooth injury | 9 | Injury, poisoning and procedural complications | 15.44 | 8.02 | 29.75 | 2.09 |
| faeces discoloured | 8 | Gastrointestinal disorders | 3.94 | 1.96 | 7.89 | 0.63 |
| idiopathic intracranial hypertension | 8 | Nervous system disorders | 44.73 | 22.30 | 89.73 | 2.54 |
| drug resistance | 7 | General disorders and administration site conditions | 3.40 | 1.62 | 7.14 | 0.36 |
| drug eruption | 6 | Skin and subcutaneous tissue disorders | 3.61 | 1.62 | 8.06 | 0.29 |
| drug administered to patient of inappropriate age | 6 | Injury, poisoning and procedural complications | 9.42 | 4.22 | 21.01 | 1.22 |
| teeth brittle | 5 | Gastrointestinal disorders | 44.02 | 18.27 | 106.08 | 1.74 |
| enamel anomaly | 5 | Gastrointestinal disorders | 158.05 | 65.32 | 382.40 | 1.95 |
| dental caries | 5 | Gastrointestinal disorders | 3.56 | 1.48 | 8.57 | 0.10 |
| bone hyperpigmentation | 5 | Musculoskeletal and connective tissue disorders | 722.26 | 292.74 | 1781.98 | 2.01 |
| vulvovaginal mycotic infection | 4 | Infections and infestations | 10.02 | 3.75 | 26.73 | 0.71 |
| tongue discolouration | 4 | Gastrointestinal disorders | 9.63 | 3.61 | 25.71 | 0.69 |
| sensitivity of teeth | 4 | Gastrointestinal disorders | 18.66 | 6.99 | 49.82 | 1.05 |
| social problem | 4 | Social circumstances | 10.53 | 3.95 | 28.12 | 0.75 |
| yellow skin | 3 | Skin and subcutaneous tissue disorders | 6.62 | 2.13 | 20.56 | 0.00 |
| drug rash with eosinophilia and systemic symptoms | 3 | Skin and subcutaneous tissue disorders | 7.34 | 2.36 | 22.80 | 0.07 |
| cerebellar syndrome | 3 | Nervous system disorders | 14.09 | 4.53 | 43.75 | 0.42 |
| deafness neurosensory | 3 | Ear and labyrinth disorders | 9.11 | 2.93 | 28.29 | 0.20 |
| Omadacycline | off label use | 240 | Injury, poisoning and procedural complications | 13.93 | 11.81 | 16.42 | 2.86 |
| nausea | 111 | Gastrointestinal disorders | 4.65 | 3.78 | 5.71 | 1.66 |
| vomiting | 65 | Gastrointestinal disorders | 4.23 | 3.27 | 5.47 | 1.53 |
| incorrect dose administered | 65 | Injury, poisoning and procedural complications | 10.88 | 8.41 | 14.08 | 2.81 |
| incorrect product administration duration | 44 | Injury, poisoning and procedural complications | 78.11 | 57.43 | 106.24 | 4.87 |
| diarrhoea | 39 | Gastrointestinal disorders | 1.73 | 1.25 | 2.40 | 0.24 |
| drug dose titration not performed | 36 | Injury, poisoning and procedural complications | 750.63 | 533.89 | 1055.37 | 5.54 |
| hepatic function abnormal | 34 | Hepatobiliary disorders | 23.76 | 16.80 | 33.60 | 3.57 |
| hospitalisation | 29 | Surgical and medical procedures | 6.21 | 4.27 | 9.02 | 1.89 |
| rash | 25 | Skin and subcutaneous tissue disorders | 1.74 | 1.17 | 2.60 | 0.14 |
| abdominal pain upper | 25 | Gastrointestinal disorders | 3.48 | 2.33 | 5.19 | 1.07 |
| abdominal discomfort | 18 | Gastrointestinal disorders | 3.05 | 1.91 | 4.88 | 0.78 |
| hypersensitivity | 18 | Immune system disorders | 2.82 | 1.76 | 4.51 | 0.67 |
| drug ineffective for unapproved indication | 17 | General disorders and administration site conditions | 10.42 | 6.43 | 16.89 | 2.26 |
| aspartate aminotransferase increased | 15 | Investigations | 6.82 | 4.09 | 11.40 | 1.70 |
| unevaluable event | 14 | General disorders and administration site conditions | 5.02 | 2.95 | 8.52 | 1.29 |
| alanine aminotransferase increased | 14 | Investigations | 5.54 | 3.26 | 9.41 | 1.41 |
| tooth discolouration | 12 | Gastrointestinal disorders | 119.38 | 67.33 | 211.67 | 3.48 |
| blood bilirubin increased | 7 | Investigations | 6.32 | 3.00 | 13.32 | 1.02 |
| lip swelling | 6 | Gastrointestinal disorders | 5.52 | 2.47 | 12.35 | 0.73 |
| rash pruritic | 6 | Skin and subcutaneous tissue disorders | 3.33 | 1.49 | 7.45 | 0.20 |
| wound secretion | 5 | Injury, poisoning and procedural complications | 30.55 | 12.66 | 73.71 | 1.62 |
| osteomyelitis | 4 | Infections and infestations | 4.35 | 1.63 | 11.62 | 0.05 |
| product administration error | 4 | Injury, poisoning and procedural complications | 6.64 | 2.48 | 17.75 | 0.42 |
| wound infection staphylococcal | 4 | Infections and infestations | 48.51 | 18.13 | 129.79 | 1.34 |
| localised infection | 4 | Infections and infestations | 4.24 | 1.58 | 11.33 | 0.03 |
| infusion site phlebitis | 4 | General disorders and administration site conditions | 517.20 | 191.92 | 1393.77 | 1.54 |
| eosinophilia | 4 | Blood and lymphatic system disorders | 6.42 | 2.40 | 17.18 | 0.39 |
| vomiting projectile | 3 | Gastrointestinal disorders | 34.12 | 10.96 | 106.16 | 0.70 |
| tongue discolouration | 3 | Gastrointestinal disorders | 18.33 | 5.89 | 57.01 | 0.52 |
| mycobacterial infection | 3 | Infections and infestations | 46.82 | 15.04 | 145.71 | 0.76 |
| faeces soft | 3 | Gastrointestinal disorders | 10.90 | 3.50 | 33.89 | 0.30 |
| product administered to patient of inappropriate age | 3 | Injury, poisoning and procedural complications | 17.28 | 5.55 | 53.75 | 0.50 |
| bilirubin conjugated increased | 3 | Investigations | 31.79 | 10.22 | 98.90 | 0.68 |
| clostridium difficile colitis | 3 | Infections and infestations | 7.42 | 2.39 | 23.08 | 0.07 |
| skin infection | 3 | Infections and infestations | 7.09 | 2.28 | 22.05 | 0.04 |
| papule | 3 | Skin and subcutaneous tissue disorders | 13.15 | 4.23 | 40.90 | 0.39 |
| Sarecycline | headache | 15 | Nervous system disorders | 4.09 | 2.37 | 7.07 | 0.92 |
| dizziness | 11 | Nervous system disorders | 3.70 | 1.98 | 6.92 | 0.66 |
| vision blurred | 9 | Eye disorders | 11.33 | 5.72 | 22.43 | 1.74 |
| photosensitivity reaction | 4 | Skin and subcutaneous tissue disorders | 37.47 | 13.79 | 101.77 | 1.27 |
| seizure | 4 | Nervous system disorders | 6.20 | 2.28 | 16.85 | 0.33 |
| liver injury | 3 | Hepatobiliary disorders | 23.38 | 7.41 | 73.69 | 0.59 |
| intracranial pressure increased | 3 | Nervous system disorders | 84.66 | 26.85 | 266.95 | 0.83 |
| tooth discolouration | 3 | Gastrointestinal disorders | 167.49 | 53.10 | 528.24 | 0.88 |
| Eravacycline | off label use | 39 | Injury, poisoning and procedural complications | 17.02 | 11.11 | 26.07 | 2.56 |
| nausea | 11 | Gastrointestinal disorders | 2.96 | 1.57 | 5.57 | 0.36 |
| blood fibrinogen decreased | 11 | Investigations | 2257.54 | 1195.31 | 4263.73 | 3.57 |
| hypofibrinogenaemia | 4 | Blood and lymphatic system disorders | 901.33 | 329.66 | 2464.33 | 1.55 |
| phlebitis | 3 | Vascular disorders | 95.70 | 30.23 | 302.96 | 0.84 |
| lipase increased | 3 | Investigations | 70.52 | 22.28 | 223.21 | 0.81 |
| pancreatic enzymes increased | 3 | Investigations | 384.29 | 121.31 | 1217.39 | 0.91 |
| pancreatitis | 3 | Gastrointestinal disorders | 10.77 | 3.40 | 34.10 | 0.27 |
| prescribed overdose | 3 | Injury, poisoning and procedural complications | 29.68 | 9.38 | 93.94 | 0.66 |
| prothrombin time prolonged | 3 | Investigations | 80.38 | 25.39 | 254.44 | 0.82 |
| Demeclocycline | confusional state | 5 | Psychiatric disorders | 17.59 | 6.79 | 45.57 | 1.27 |
| asthenia | 5 | General disorders and administration site conditions | 7.23 | 2.79 | 18.73 | 0.62 |
| thirst | 4 | General disorders and administration site conditions | 126.38 | 44.42 | 359.53 | 1.46 |
| medication error | 3 | Injury, poisoning and procedural complications | 32.16 | 9.82 | 105.39 | 0.66 |
| hyponatraemia | 3 | Metabolism and nutrition disorders | 28.21 | 8.61 | 92.45 | 0.62 |
| convulsion | 3 | Nervous system disorders | 22.40 | 6.84 | 73.40 | 0.55 |
| mental status changes | 3 | Psychiatric disorders | 58.28 | 17.79 | 190.98 | 0.77 |
| mucosal dryness | 3 | General disorders and administration site conditions | 777.31 | 237.06 | 2548.77 | 0.92 |
| diabetes insipidus | 3 | Endocrine disorders | 653.37 | 199.28 | 2142.13 | 0.92 |

**Figure S1. Heatmap of tetracyclines-related AEs categorized by SOC.**


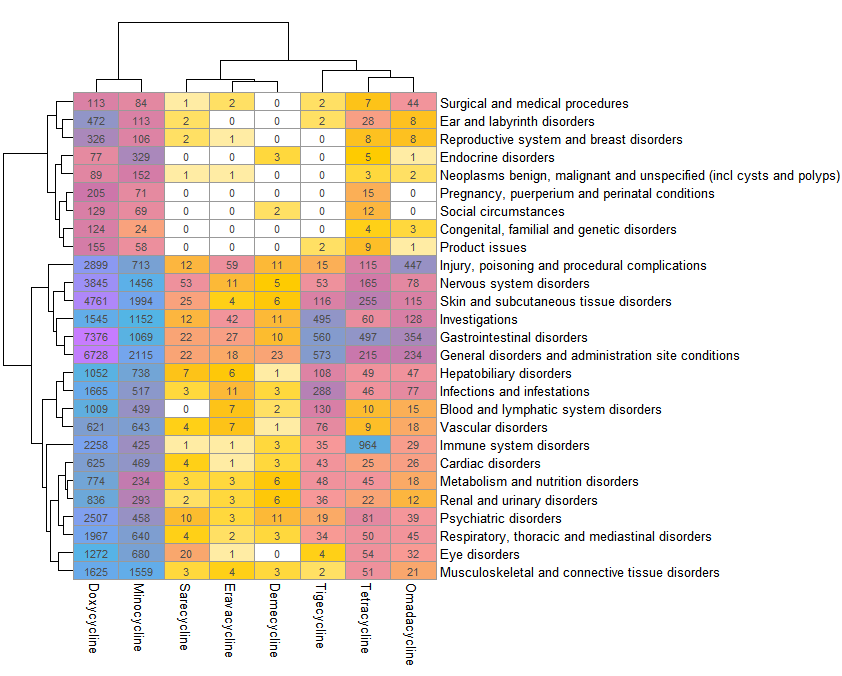

Supplement: Supplementary file 1 [file 30817e578c660c1befa313e2.docx]
